# Supplementary material
Source: Research Square preprint supplement (doi:10.21203/rs.3.rs-8919271/v1)

Supplementary Information

Biodiversity and Conservation

Roger Ayazo-Berrocal1,2*; Wesley Dáttilo3; Camilo Correa-Ayram4

1Grupo de investigación Ecología y Territorio, Facultad de Estudios Ambientales y Rurales, Pontificia Universidad Javeriana, Bogotá, Colombia. Orcid: [0000-0002-5221-8728](https://orcid.org/0000-0002-5221-8728)

2Grupo de investigación Biodiversidad-Unicórdoba, Facultad de Ciencias Básicas, Universidad de Córdoba, Montería, Colombia

3Red de Ecoetología, Instituto de Ecología AC, Xalapa, Veracruz, México. Orcid: [0000-0002-4758-4379](https://orcid.org/0000-0002-4758-4379)

4Departamento de Ecología y Territorio, Facultad de Estudios Ambientales y Rurales, Pontificia Universidad Javeriana, Bogotá, Colombia. Orcid: 0000-0001-8619-0295

Corresponding autor:

*correa.c@javeriana.edu.co

Table S1. Butterfly specimens for which morphological traits were measured. Traits include proboscis length, wing length, and body length (mm), used to evaluate species-level functional variation across pasture management types.

| Species | Proboscis length (mm) | Wing length (mm) | Body length (mm) |
| --- | --- | --- | --- |
| *Agraulis vanillae** | 21.121 | 37.91 | 20.356 |
| *Agraulis vanillae** | 17.57 | 33.576 | 19.502 |
| *Agraulis vanillae** | 16.053 | 34.337 | 19.861 |
| *Agraulis vanillae* | 16.091 |  |  |
| *Agraulis vanillae** |  | 39.261 |  |
| *Agraulis vanillae** |  | 40.392 | 22.827 |
| *Agraulis vanillae** |  | 34.105 |  |
| *Anarthia amathea** | 10.82 | 22.983 |  |
| *Anarthia amathea** | 11.634 | 26.811 |  |
| *Anarthia amathea** | 10.447 | 26.167 |  |
| *Anarthia amathea** | 12.637 | 28.849 | 17.237 |
| *Anarthia amathea** | 13.186 | 29.279 | 18.696 |
| *Anarthia jatrophae** | 10.968 | 30.99 | 18.477 |
| *Anarthia jatrophae** | 10.504 | 25.273 | 15.454 |
| *Anarthia jatrophae** | 12.029 | 25.055 |  |
| *Anarthia jatrophae** | 13.675 | 29.992 | 16.759 |
| *Anarthia jatrophae** | 10.068 | 24.176 | 14.551 |
| *Aricoris erostratus** | 8.87 | 15.179 | 11.023 |
| *Ascia monuste** | 13.304 | 27.567 | 20.018 |
| *Ascia monuste** | 14.346 | 28.485 |  |
| *Ascia monuste** | 13.239 | 27.729 |  |
| *Ascia monuste** | 14.763 | 28.842 |  |
| *Ascia monuste** |  | 29.297 |  |
| *Battus polidamas* | 25.711 | 39.176 | 22.049 |
| *Battus polidamas* | 16.673 | 34.268 | 22.272 |
| *Battus polidamas** | 22.036 | 44.858 | 26.016 |
| *Battus polidamas** | 20.576 |  |  |
| *Burnsius orcus* | 10.353 | 13.604 | 10.123 |
| *Burnsius orcus* | 8.911 | 12.481 | 9.849 |
| *Burnsius orcus* | 8.157 | 12.941 | 10.66 |
| *Burnsius orcus* | 10.506 | 14.098 |  |
| *Burnsius orcus* | 10.165 | 13.475 | 11.185 |
| *Calephelis iris* | 6.127 | 11.347 | 7.778 |
| *Calephelis iris* | 5.498 | 12.097 | 7.885 |
| *Calephelis iris* | 5.307 | 13.184 |  |
| *Calephelis iris* | 4.822 |  |  |
| *Calephelis iris* | 5.271 | 11.098 | 7.84 |
| *Calephelis iris* | 5.745 |  |  |
| *Calephelis iris* | 5.92 |  |  |
| *Chioides catillus*** |  | 24.353 | 19.729 |
| *Chioides catillus* | 13.019 |  |  |
| *Chosyne lacinia** | 7.304 | 21.482 |  |
| *Chosyne lacinia* | 8.385 | 24.148 | 14.426 |
| *Chosyne lacinia* | 8.267 | 26.341 | 16.149 |
| *Chosyne lacinia* | 7.031 | 22.8 | 13.124 |
| *Chosyne lacinia* | 8.415 |  | 15.394 |
| *Chosyne lacinia* | 8.472 | 25.878 |  |
| *Cogia calchas*** |  | 16.371 | 13.126 |
| *Cogia calchas** | 13.041 |  |  |
| *Dannaus gilippus** | 11.914 | 36.703 |  |
| *Dannaus gilippus** | 10.983 | 36.238 |  |
| *Dannaus gilippus** | 9.979 | 35.917 |  |
| *Dannaus gilippus** | 9.452 | 39.619 |  |
| *Dannaus gilippus** | 10.207 | 35.643 | 21.897 |
| *Dryadula phaetusa** | 16.071 | 40.718 | 28.818 |
| *Dryadula phaetusa** | 12.588 | 35.422 |  |
| *Dryadula phaetusa** | 14.518 | 39.548 | 28.96 |
| *Dryadula phaetusa** | 14.997 | 34.152 |  |
| *Dryadula phaetusa** | 14.848 | 37.215 | 24.198 |
| *Dryadula phaetusa** | 14.331 |  |  |
| *Dryadula phaetusa** | 12.683 |  | 26.63 |
| *Dryadula phaetusa** | 15.329 | 39.482 |  |
| *Dryadula phaetusa** | 16.776 |  |  |
| *Dryadula phaetusa** | 14.413 | 40.136 |  |
| *Euptoieta hegesia** | 12.173 | 26.178 |  |
| *Euptoieta hegesia* | 16.047 | 32.203 |  |
| *Euptoieta hegesia* | 12.15 | 27.673 | 16.101 |
| *Euptoieta hegesia* | 13.617 | 30.725 |  |
| *Eurema albula** | 11.585 | 18.113 |  |
| *Eurema albula** | 11.692 |  | 15.414 |
| *Eurema daira** | 8.641 | 14.381 | 11.582 |
| *Eurema daira** | 8.871 | 13.576 | 9.831 |
| *Eurema daira** | 10.357 | 14.962 |  |
| *Eurema daira** | 7.788 | 16.015 | 12.682 |
| *Gorgythion begga*** |  | 13.347 | 11.423 |
| *Gorgythion begga** | 8.911 |  |  |
| *Hedone vibex* | 19.721 | 14.371 | 12.177 |
| *Hedone vibex* | 14.442 | 12.937 |  |
| *Hedone vibex* | 17.467 | 13.274 |  |
| *Hedone vibex* | 16.402 |  | 12.958 |
| *Hedone vibex* | 14.373 |  |  |
| *Heliconius erato** | 18.359 | 33.892 | 20.432 |
| *Heliconius erato** | 15.264 | 34.59 | 21.614 |
| *Heliconius erato** | 19.649 | 35.521 | 21.266 |
| *Heliconius erato** | 20.666 | 35.97 | 22.71 |
| *Heliconius erato** |  | 35.661 | 22.922 |
| *Heliconius sara** | 18.233 | 35.867 | 21.057 |
| *Heliconius sara** | 15.713 | 33.45 | 20.288 |
| *Heliconius sara* | 18.729 | 33.529 | 18.121 |
| *Heliconius sara* | 17.789 | 33.653 | 17.06 |
| *Heliopetes alana** | 10.708 |  |  |
| *Heliopetes alana** | 10.47 | 15.825 |  |
| *Heliopetes alana** | 11.864 | 16.457 |  |
| *Heliopetes alana** | 10.799 | 21.724 | 12.724 |
| *Heliopetes alana** | 9.685 | 16.109 | 11.858 |
| *Hemiargus hanno** | 5.614 | 8.577 | 7.075 |
| *Hemiargus hanno** | 4.011 | 8.525 | 6.593 |
| *Hemiargus hanno** | 5.252 | 8.42 | 7.431 |
| *Hemiargus hanno** | 4.861 | 8.632 | 7.114 |
| *Heraclides thoas* | 16.434 | 47.614 | 21.889 |
| *Heraclides thoas* | 20.418 | 49.43 | 25.01 |
| *Hermeuptichia hermes* | 4.582 | 17.083 | 10.662 |
| *Hermeuptichia hermes* | 4.269 | 16.129 | 12.191 |
| *Hermeuptichia hermes* |  | 15.171 |  |
| *Hermeuptichia hermes* |  | 16.16 |  |
| *Hermeuptichia hermes* |  | 16.771 |  |
| *Junonia evarete** | 9.447 | 26.281 | 15.279 |
| *Junonia evarete** | 11.998 | 26.661 | 16.757 |
| *Junonia evarete** | 10.918 | 24.15 | 15.173 |
| *Junonia evarete** | 12.137 | 23.51 | 16.042 |
| *Junonia evarete** | 11.805 | 25.5 | 16.876 |
| *Mestra hersilia** | 6.953 | 24.733 |  |
| *Mestra hersilia*** |  | 22.106 | 14.296 |
| *Ministrimon una*** |  | 10.315 | 8.121 |
| *Ministrimon una** | 6.257 |  |  |
| *Parides anchises** | 18.373 | 39.067 | 25.416 |
| *Phoebis sennae** | 30.788 | 33.335 |  |
| *Phoebis sennae** | 28.001 |  |  |
| *Phoebis sennae** | 30.461 | 34.017 |  |
| *Phoebis sennae** | 24.966 | 30.97 |  |
| *Phoebis sennae** | 21.025 | 31.016 |  |
| *Phoebis sennae** |  |  | 21.964 |
| *Pirysitia venusta** | 8.965 | 16.368 | 11.254 |
| *Pirysitia venusta** | 10.088 | 16.088 | 10.741 |
| *Pirysitia venusta** | 9.511 | 15.694 | 12.655 |
| *Pirysitia venusta** | 13.081 | 15.571 | 11.197 |
| *Spicauda procne* | 15.372 | 18.686 | 14.534 |
| *Spicauda procne* | 15.842 | 20.042 | 15.184 |
| *Spicauda procne* | 17.796 | 19.162 | 14.515 |
| *Spicauda procne** | 17.638 | 20.19 | 14.739 |
| *Spicauda procne** | 15.63 | 16.436 | 11.672 |
| *Spicauda teleus** | 15.209 | 24.379 | 18.183 |
| *Staphylus sp1* |  | 14.401 | 11.614 |
| *Staphylus sp1** | 8.911 |  |  |
|  | | | |
| * Specimens obtained from museum collections | | | |
| ** Measurements derived from photographs available in *Butterflies of America* (Warren, Davis, Stangeland et al., 2024) | | | |

Table S2. Morphological traits, interaction frequencies, and interactive roles (PC1) of butterfly species recorded across pasture management types.

| Species | Management | Interaction frecuency |  | Role (PC1) | | Wing length (mm) | | SD_Wing length (mm) | Body length (mm) | SD_Body length (mm) | Proboscis length (mm) | SD_Proboscis length (mm) |
| --- | --- | --- | --- | --- | --- | --- | --- | --- | --- | --- | --- | --- |
| *Agraulis vanillae* | FAP | 2 |  | 1.455 | 36.60 | | 2.96 | | 20.64 | 1.50 | 17.71 | 2.38 |
| *Anartia amathea* | FAP | 6 |  | 0.292 | 26.82 | | 2.52 | | 17.97 | 1.03 | 11.74 | 1.16 |
| *Anartia jatrophae* | FAP | 43 |  | 0.512 | 27.10 | | 3.15 | | 16.31 | 1.71 | 11.45 | 1.44 |
| *Aricoris erostratus* | FAP | 3 |  | 0.462 | 15.18 | |  | | 11.02 |  | 8.87 |  |
| *Ascia monuste* | FAP | 1 |  | 1.409 | 28.38 | | 0.73 | | 20.02 |  | 13.91 | 0.76 |
| *Battus polydamas* | FAP | 14 |  | 0.698 | 39.43 | | 5.30 | | 23.45 | 2.23 | 21.25 | 3.74 |
| *Burnsius orcus* | FAP | 111 |  | 1.469 | 13.32 | | 0.62 | | 10.45 | 0.59 | 9.62 | 1.03 |
| *Chioides catillus* | FAP | 3 |  | 0.489 | 24.35 | |  | | 19.73 |  | 13.02 |  |
| *Chlosyne lacinia* | FAP | 4 |  | 1.340 | 24.13 | | 2.04 | | 14.77 | 1.31 | 7.98 | 0.64 |
| *Cogia calchas* | FAP | 9 |  | 0.799 | 16.37 | |  | | 13.13 |  | 13.04 |  |
| *Danaus gilippus* | FAP | 6 |  | 1.193 | 36.82 | | 1.61 | | 21.90 |  | 10.51 | 0.96 |
| *Dryadula phaetusa* | FAP | 9 |  | 1.052 | 38.10 | | 2.53 | | 27.15 | 2.24 | 14.66 | 1.31 |
| *Euptoieta hegesia* | FAP | 4 |  | 0.051 | 29.19 | | 2.76 | | 16.10 |  | 13.50 | 1.83 |
| *Eurema albula* | FAP | 1 |  | 1.089 | 18.11 | |  | | 15.41 |  | 11.64 | 0.08 |
| *Eurema daira* | FAP | 4 |  | 1.316 | 14.73 | | 1.03 | | 11.37 | 1.44 | 8.91 | 1.07 |
| *Hedone vibex* | FAP | 228 |  | 3.635 | 13.53 | | 0.75 | | 12.57 | 0.55 | 16.48 | 2.24 |
| *Heliconius erato* | FAP | 3 |  | 0.343 | 35.13 | | 0.86 | | 21.79 | 1.03 | 18.48 | 2.35 |
| *Heliconius sara* | FAP | 2 |  | 2.343 | 34.12 | | 1.16 | | 19.13 | 1.86 | 17.62 | 1.33 |
| *Heliopetes alana* | FAP | 71 |  | 3.130 | 17.53 | | 2.81 | | 12.29 | 0.61 | 10.71 | 0.78 |
| *Hemiargus hanno* | FAP | 1 |  | 0.928 | 8.54 | | 0.09 | | 7.05 | 0.35 | 4.93 | 0.69 |
| *Heraclides thoas* | FAP | 3 |  | 1.409 | 48.52 | | 1.28 | | 23.45 | 2.21 | 18.43 | 2.82 |
| *Hermeuptychia hermes* | FAP | 1 |  | 0.928 | 16.26 | | 0.73 | | 11.43 | 1.08 | 4.43 | 0.22 |
| *Junonia evarete* | FAP | 88 |  | 2.154 | 25.22 | | 1.36 | | 16.03 | 0.80 | 11.26 | 1.12 |
| *Phoebis sennae* | FAP | 12 |  | 0.826 | 32.33 | | 1.57 | | 21.96 |  | 27.05 | 4.10 |
| *Pyrisitia venusta* | FAP | 7 |  | 0.627 | 15.93 | | 0.37 | | 11.46 | 0.83 | 10.41 | 1.84 |
| *Spicauda procne* | FAP | 176 |  | 3.453 | 18.90 | | 1.51 | | 14.13 | 1.40 | 16.46 | 1.16 |
| *Staphylus sp1.* | FAP | 4 |  | 0.978 | 14.40 | |  | | 11.61 |  | 8.91 |  |
| *Agraulis vanillae* | WP | 2 |  | 1.040 | 36.60 | | 2.96 | | 20.64 | 1.50 | 17.71 | 2.38 |
| *Anartia amathea* | WP | 25 |  | 1.377 | 26.82 | | 2.52 | | 17.97 | 1.03 | 11.74 | 1.16 |
| *Anartia jatrophae* | WP | 64 |  | 1.914 | 27.10 | | 3.15 | | 16.31 | 1.71 | 11.45 | 1.44 |
| *Aricoris erostratus* | WP | 1 |  | 1.387 | 15.18 | |  | | 11.02 |  | 8.87 |  |
| *Battus polydamas* | WP | 28 |  | 1.238 | 39.43 | | 5.30 | | 23.45 | 2.23 | 21.25 | 3.74 |
| *Burnsius orcus* | WP | 26 |  | 1.119 | 13.32 | | 0.62 | | 10.45 | 0.59 | 9.62 | 1.03 |
| *Calephelis iris* | WP | 1 |  | 2.314 | 11.93 | | 0.94 | | 7.83 | 0.05 | 5.53 | 0.44 |
| *Chioides catillus* | WP | 4 |  | 0.683 | 24.35 | |  | | 19.73 |  | 13.02 |  |
| *Cogia calchas* | WP | 1 |  | 1.677 | 16.37 | |  | | 13.13 |  | 13.04 |  |
| *Danaus gilippus* | WP | 2 |  | 0.921 | 36.82 | | 1.61 | | 21.90 |  | 10.51 | 0.96 |
| *Dryadula phaetusa* | WP | 13 |  | 0.802 | 38.10 | | 2.53 | | 27.15 | 2.24 | 14.66 | 1.31 |
| *Euptoieta hegesia* | WP | 1 |  | 1.387 | 29.19 | | 2.76 | | 16.10 |  | 13.50 | 1.83 |
| *Eurema albula* | WP | 2 |  | 0.921 | 18.11 | |  | | 15.41 |  | 11.64 | 0.08 |
| *Gorgythion begga* | WP | 2 |  | 1.848 | 13.35 | |  | | 11.42 |  | 8.91 |  |
| *Hedone vibex* | WP | 312 |  | 3.273 | 13.53 | | 0.75 | | 12.57 | 0.55 | 16.48 | 2.24 |
| *Heliopetes alana* | WP | 46 |  | 1.664 | 17.53 | | 2.81 | | 12.29 | 0.61 | 10.71 | 0.78 |
| *Heraclides thoas* | WP | 2 |  | 1.677 | 48.52 | | 1.28 | | 23.45 | 2.21 | 18.43 | 2.82 |
| *Hermeuptychia hermes* | WP | 3 |  | 1.938 | 16.26 | | 0.73 | | 11.43 | 1.08 | 4.43 | 0.22 |
| *Junonia evarete* | WP | 126 |  | 2.377 | 25.22 | | 1.36 | | 16.03 | 0.80 | 11.26 | 1.12 |
| *Mestra hersilia* | WP | 1 |  | 2.140 | 23.42 | | 1.86 | | 14.30 |  | 6.95 |  |
| *Phoebis sennae* | WP | 18 |  | 0.456 | 32.33 | | 1.57 | | 21.96 |  | 27.05 | 4.10 |
| *Pyrisitia venusta* | WP | 23 |  | 2.287 | 15.93 | | 0.37 | | 11.46 | 0.83 | 10.41 | 1.84 |
| *Spicauda procne* | WP | 382 |  | 3.106 | 18.90 | | 1.51 | | 14.13 | 1.40 | 16.46 | 1.16 |
| *Staphylus sp1.* | WP | 10 |  | 0.988 | 14.40 | |  | | 11.61 |  | 8.91 |  |
| *Anartia amathea* | OP | 12 |  | 0.515 | 26.82 | | 2.52 | | 17.97 | 1.03 | 11.74 | 1.16 |
| *Anartia jatrophae* | OP | 250 |  | 1.933 | 27.10 | | 3.15 | | 16.31 | 1.71 | 11.45 | 1.44 |
| *Aricoris erostratus* | OP | 2 |  | 0.845 | 15.18 | |  | | 11.02 |  | 8.87 |  |
| *Ascia monuste* | OP | 6 |  | 0.841 | 28.38 | | 0.73 | | 20.02 |  | 13.91 | 0.76 |
| *Battus polydamas* | OP | 22 |  | 0.699 | 39.43 | | 5.30 | | 23.45 | 2.23 | 21.25 | 3.74 |
| *Burnsius orcus* | OP | 108 |  | 0.899 | 13.32 | | 0.62 | | 10.45 | 0.59 | 9.62 | 1.03 |
| *Chioides catillus* | OP | 6 |  | 1.134 | 24.35 | |  | | 19.73 |  | 13.02 |  |
| *Chlosyne lacinia* | OP | 3 |  | 0.590 | 24.13 | | 2.04 | | 14.77 | 1.31 | 7.98 | 0.64 |
| *Cogia calchas* | OP | 5 |  | 1.160 | 16.37 | |  | | 13.13 |  | 13.04 |  |
| *Danaus gilippus* | OP | 59 |  | 1.004 | 36.82 | | 1.61 | | 21.90 |  | 10.51 | 0.96 |
| *Dryadula phaetusa* | OP | 65 |  | 2.379 | 38.10 | | 2.53 | | 27.15 | 2.24 | 14.66 | 1.31 |
| *Euptoieta hegesia* | OP | 1 |  | 3.113 | 29.19 | | 2.76 | | 16.10 |  | 13.50 | 1.83 |
| *Eurema albula* | OP | 1 |  | 1.187 | 18.11 | |  | | 15.41 |  | 11.64 | 0.08 |
| *Eurema daira* | OP | 3 |  | 0.694 | 14.73 | | 1.03 | | 11.37 | 1.44 | 8.91 | 1.07 |
| *Hedone vibex* | OP | 280 |  | 3.199 | 13.53 | | 0.75 | | 12.57 | 0.55 | 16.48 | 2.24 |
| *Heliconius erato* | OP | 2 |  | 1.446 | 35.13 | | 0.86 | | 21.79 | 1.03 | 18.48 | 2.35 |
| *Heliopetes alana* | OP | 39 |  | 0.500 | 17.53 | | 2.81 | | 12.29 | 0.61 | 10.71 | 0.78 |
| *Hemiargus hanno* | OP | 26 |  | 0.799 | 8.54 | | 0.09 | | 7.05 | 0.35 | 4.93 | 0.69 |
| *Hermeuptychia hermes* | OP | 4 |  | 0.917 | 16.26 | | 0.73 | | 11.43 | 1.08 | 4.43 | 0.22 |
| *Junonia evarete* | OP | 301 |  | 2.877 | 25.22 | | 1.36 | | 16.03 | 0.80 | 11.26 | 1.12 |
| *Ministrymon una* | OP | 1 |  | 1.579 | 10.32 | | 1.86 | | 8.12 |  | 6.26 |  |
| *Parides anchises* | OP | 4 |  | 0.515 | 39.07 | |  | | 25.42 |  | 18.37 |  |
| *Phoebis sennae* | OP | 31 |  | 1.899 | 32.33 | | 1.57 | | 21.96 |  | 27.05 | 4.10 |
| *Pyrisitia venusta* | OP | 5 |  | 0.119 | 15.93 | | 0.37 | | 11.46 | 0.83 | 10.41 | 1.84 |
| *Spicauda procne* | OP | 467 |  | 3.103 | 18.90 | | 1.51 | | 14.13 | 1.40 | 16.46 | 1.16 |
| *Spicauda teleus* | OP | 2 |  | 1.107 | 24.38 | |  | | 18.18 |  | 15.21 |  |
| *Staphylus sp1.* | OP | 1 |  | 1.187 | 14.40 | |  | | 11.61 |  | 8.91 |  |

Table S3. Floral traits measured for plant species recorded across pasture management types

| *Species* | Origin | Corolla type | Color | Shape | Corolla width (mm) | Corolla length (mm) |
| --- | --- | --- | --- | --- | --- | --- |
| *Abutilon sp* | native | Dialipetalous | yellow | rotaceous | 7.553 | 6.166 |
| *Aclepias curassavica* | native | Gamopetalous | red | rotaceous | 10.5765 | 3.23475 |
| *Acmella alba* | native | Gamopetalous | white | tubular | 10.36675 | 1.6524 |
| *Aeschynoneme americana* | native | Dialipetalous | yellowish-brown | papilionaceous flower | 9.6418 | 8.736916667 |
| *Alternanthera halimifolia* | native | Achlamydeous | white | achlamydeous | 1.97625 | 2.880666667 |
| *Asystasia intrusa* | exotic | Gamopetalous | white | tubular | 11.003875 | 12.34144444 |
| *Calopogonium mucunoides* | native | Dialipetalous | purple | papilionaceous flower | 7.878 | 11.01066667 |
| *Capsicum annuum* | native | Gamopetalous | white | rotaceous | 10.2515 | 2.1255 |
| *Centrocema virginianum* | native | Dialipetalous | purple | papilionaceous flower | 27.14 | 17.607 |
| *Cissus sp** | native | Gamopetalous | yellow | bell-shaped to urn-shaped | 1.5 | 1.5 |
| *Citrus Limon* | exotic | Dialipetalous | white | rotaceous | 18.091 | 3.193333333 |
| *Cnidocolus urens* | native | Achlamydeous | white | rotaceous | 4.846666667 | 4.389333333 |
| *Combretum fruticosum** | native | Achlamydeous | yellow | achlamydeous | 4.529 | 5.096 |
| *Commelina erecta* | native | Dialipetalous | blue | zygomorphic | 19.08985714 | 5.158571429 |
| *Corchorus aestuans* | native | Dialipetalous | yellow | rotaceous | 7.475875 | 3.988363636 |
| *Crotalaria spectabilis* | exotic | Dialipetalous | yellow | papilionaceous flower | 24.136875 | 17.009875 |
| *Croton hirtus* | native | Dialipetalous | white | rotaceous | 2.41225 | 1.2212 |
| *Cucumis melo* | exotic | Gamopetalous | yellow | rotaceous | 21.61575 | 8.781444444 |
| *Cuphea carthagenensis* | native | Gamopetalous | purple | tubular | 5.72 | 7.053 |
| *Desmodium incanum* | native | Dialipetalous | Pink | papilionaceous flower | 6.9068 | 6.52 |
| *Desmodium scorpiurus** | native | Dialipetalous | Pink | papilionaceous flower | 4 | 4 |
| *Eleutheranthera ruderalis* | native | Gamopetalous | yellow | tubular | 3.398875 | 4.44675 |
| *Euphorbia heterophylla** | native | Achlamydeous | red | achlamydeous | 2.5 | 2.5 |
| *Funastrum clausum* | native | Gamopetalous | white | rotaceous | 15.488 | 4.993166667 |
| *Galictia sp* | native | Dialipetalous | Pink | papilionaceous flower | 4.611142857 | 6.882125 |
| *Galinsoga quadriradiata* | native | Gamopetalous | yellow | tubular | 13.65871429 | 3.9376 |
| *Gouania rosei* | native | Achlamydeous | white | petaloid calyx | 2.3092 | 1.765111111 |
| *Heliotropium cuspidatum* | native | Gamopetalous | white | salverform | 4.13525 | 7.94975 |
| *Heliotropium indicum* | exotic | Gamopetalous | white | salverform | 4.4376 | 4.9348 |
| *Hydrolea spinosa* | native | Gamopetalous | blue | rotaceous | 13.95075 | 4.424636364 |
| *Hyptis suaveolens* | native | Gamopetalous | purple | two-lipped | 4.4705 | 7.332333333 |
| *Ipomoea muricata* | native | Gamopetalous | lilac | bell-shaped | 29.10411111 | 27.67382353 |
| *Isertia haenkeana* | native | Gamopetalous | red | salverform | 5.1225 | 27.963 |
| *Lantana camara* | native | Gamopetalous | red | tubular | 5.697444444 | 10.14988889 |
| *Lecythis minor** | native | Dialipetalous | white | obovate | 46.168 | 10.063 |
| *Limnocharis flava** | native | Dialipetalous | yellow | rotaceous | 50 | 22.5 |
| *Lippia dulcis* | native | Gamopetalous | white | two-lipped | 1.753 | 2.372666667 |
| *Ludwigia decurrens* | native | Dialipetalous | yellow | rotaceous | 29.74966667 | 3.345857143 |
| *Ludwigia erecta* | native | Dialipetalous | yellow | rotaceous | 10.81775 | 9.465888889 |
| *Ludwigia octovalvis* | native | Dialipetalous | yellow | rotaceous | 23.69788889 | 5.4396 |
| *Ludwigia peruviana** | native | Dialipetalous | yellow | rotaceous | 30 | 9.139 |
| *Macroptilium lathyroides* | native | Dialipetalous | red | papilionaceous flower | 8.0005 | 16.8076 |
| *Malachra alceifolia* | native | Dialipetalous | yellow | rotaceous | 24.33266667 | 13.7277 |
| *Malachra fasciata** | native | Dialipetalous | white | rotaceous | 12.5 | 7 |
| *Melampodium divaricatum* | native | Gamopetalous | yellow | tubular | 13.21233333 | 2.723 |
| *Melochia corchorifolia* | exotic | Dialipetalous | pink | spatulate | 6.726142857 | 3.889833333 |
| *Melochia parvifolia* | native | Dialipetalous | white | spatulate | 23.60925 | 7.378125 |
| *Melothria scabra* | native | Dialipetalous | yellow | rotaceous | 6.019777778 | 2.823181818 |
| *Mikania sp.* | native | Gamopetalous | white | tubular | 4.7 | 2.7 |
| *Momordica charantia* | exotic | Dialipetalous | yellow | rotaceous | 29.5484 | 6.110666667 |
| *Murdannia keisak* | exotic | Dialipetalous | purple | rotaceous | 8.5 | 0.4 |
| *Nymphoides sp* | native | Gamopetalous | white | salverform | 21.7734 | 9.713 |
| *Physalis angulata** | native | Gamopetalous | yellow | rotaceous | 15.613 | 9.145 |
| *Portulaca oleracea* | native | Dialipetalous | yellow | rotaceous | 8.280857143 | 5.398285714 |
| *Richardia brasil* | native | Gamopetalous | white | tubular | 4.785545455 | 4.604769231 |
| *Richardia scabra* | native | Gamopetalous | white | tubular | 8.294 | 3.935 |
| *Senna obtusifolia* | native | Dialipetalous | yellow | bell-shaped | 25.8104 | 14.0786 |
| *Sida acuta* | native | Dialipetalous | yellow | rotaceous | 25.30385714 | 8.9515 |
| *Sida cerradoensis* | native | Dialipetalous | orange | rotaceous | 25.98675 | 11.786 |
| *Sida sp* | native | Dialipetalous | white | rotaceous | 16.197 | 4.421833333 |
| *Simarouba amara** | native | Dialipetalous | green | rotaceous | 5.565 | 2.654 |
| *Spermacoce densiflora* | native | Gamopetalous | white | tubular | 2.378833333 | 1.838714286 |
| *Spermacoce remota** | native | Gamopetalous | white | tubular | 8.5 | 3.25 |
| *Tarenaya hassleriana** | exotic | Dialipetalous | white | rotaceous | 40 | 25 |
| *Thalia geniculata* | native | Gamopetalous | purple | tubular | 4 | 16.73116667 |
| *Torenia crustacea* | exotic | Gamopetalous | purple | tubular | 3.7225 | 7.445125 |
| *Varronia inermis* | native | Gamopetalous | white | salverform | 1.6505 | 3.84725 |
|  | | | | | | |
| * Corolla width and corolla length obtained from the literature | | | | | | |

Table S4. Plant–butterfly interaction matrices for the three cattle pasture management systems

- FAP plant–butterfly matrix

|  | Anartia_amathea | Anartia_jatrophae | Battus_polydamas | Burnsius_orcus | Chioides_catillus | Chlosyne_lacinia | Dryadula_phaetusa | Euptoieta_hegesia | Eurema_daira | Hedone_vibex | Heliopetes_alana | Hemiargus_hanno | Junonia_evarete | Spicauda_procne | Aricoris_erostratus | Heliconius_erato | Phoebis_sennae | Staphylus_sp1. | Cogia_calchas | Danaus_gilippus | Pyrisitia_venusta | Heliconius_sara | Eurema_albula | Hermeuptychia_hermes | Agraulis_vanillae | Ascia_monuste | Heraclides_thoas |
| --- | --- | --- | --- | --- | --- | --- | --- | --- | --- | --- | --- | --- | --- | --- | --- | --- | --- | --- | --- | --- | --- | --- | --- | --- | --- | --- | --- |
| Aeschynomene_americana | 0 | 0 | 0 | 0 | 0 | 0 | 0 | 0 | 1 | 0 | 0 | 0 | 0 | 0 | 0 | 0 | 0 | 0 | 0 | 0 | 0 | 0 | 0 | 0 | 0 | 0 | 0 |
| Calopogonium_mucunoides | 0 | 0 | 0 | 2 | 1 | 0 | 0 | 0 | 0 | 13 | 1 | 0 | 3 | 29 | 1 | 0 | 0 | 0 | 2 | 0 | 1 | 0 | 0 | 0 | 0 | 0 | 0 |
| Desmodium_incanum | 0 | 0 | 0 | 1 | 0 | 2 | 0 | 0 | 0 | 1 | 3 | 0 | 0 | 2 | 0 | 0 | 0 | 0 | 0 | 0 | 0 | 0 | 0 | 0 | 0 | 0 | 0 |
| Heliotropium_cuspidatum | 0 | 0 | 0 | 0 | 0 | 0 | 1 | 0 | 0 | 0 | 0 | 0 | 0 | 0 | 0 | 0 | 0 | 0 | 0 | 0 | 0 | 0 | 0 | 0 | 0 | 0 | 0 |
| Ipomoea_muricata | 0 | 0 | 1 | 0 | 0 | 0 | 0 | 0 | 0 | 0 | 0 | 0 | 0 | 0 | 0 | 0 | 0 | 0 | 0 | 0 | 0 | 0 | 0 | 0 | 0 | 0 | 0 |
| Lantana_camara | 3 | 0 | 5 | 0 | 0 | 0 | 0 | 0 | 0 | 0 | 0 | 0 | 1 | 0 | 0 | 0 | 0 | 0 | 0 | 0 | 0 | 0 | 0 | 0 | 0 | 0 | 0 |
| Malachra_alceifolia | 1 | 13 | 1 | 2 | 0 | 0 | 1 | 0 | 0 | 65 | 8 | 0 | 39 | 47 | 0 | 0 | 0 | 0 | 7 | 0 | 1 | 0 | 1 | 0 | 0 | 0 | 0 |
| Melampodium_divaricatum | 0 | 0 | 0 | 0 | 0 | 2 | 0 | 1 | 1 | 1 | 0 | 0 | 0 | 0 | 0 | 0 | 0 | 0 | 0 | 0 | 0 | 0 | 0 | 0 | 0 | 0 | 0 |
| Melochia_parvifolia | 0 | 0 | 1 | 1 | 0 | 0 | 0 | 0 | 0 | 22 | 1 | 0 | 8 | 17 | 0 | 0 | 0 | 0 | 0 | 0 | 0 | 0 | 0 | 0 | 0 | 0 | 0 |
| Momordica_charantia | 0 | 0 | 1 | 0 | 0 | 0 | 3 | 0 | 0 | 33 | 1 | 0 | 2 | 10 | 0 | 1 | 2 | 0 | 0 | 0 | 0 | 0 | 0 | 0 | 0 | 0 | 0 |
| Richardia_scabra | 0 | 0 | 0 | 0 | 0 | 0 | 0 | 0 | 0 | 0 | 0 | 0 | 5 | 0 | 0 | 0 | 0 | 0 | 0 | 0 | 0 | 0 | 0 | 0 | 0 | 0 | 0 |
| Sida_acuta | 1 | 2 | 0 | 71 | 1 | 0 | 1 | 1 | 0 | 61 | 40 | 1 | 4 | 13 | 1 | 0 | 0 | 0 | 0 | 0 | 2 | 0 | 0 | 1 | 0 | 0 | 0 |
| Sida_sp. | 0 | 9 | 0 | 21 | 1 | 0 | 0 | 1 | 0 | 8 | 7 | 0 | 2 | 1 | 0 | 0 | 0 | 2 | 0 | 0 | 0 | 0 | 0 | 0 | 0 | 0 | 0 |
| Varronia_inermis | 0 | 0 | 0 | 0 | 0 | 0 | 1 | 0 | 0 | 0 | 0 | 0 | 0 | 0 | 0 | 1 | 0 | 0 | 0 | 0 | 0 | 0 | 0 | 0 | 0 | 0 | 0 |
| Croton_hirtus | 0 | 0 | 0 | 0 | 0 | 0 | 0 | 0 | 1 | 0 | 0 | 0 | 0 | 0 | 0 | 0 | 0 | 0 | 0 | 0 | 0 | 0 | 0 | 0 | 0 | 0 | 0 |
| Gouania_rosei | 0 | 0 | 0 | 0 | 0 | 0 | 0 | 0 | 0 | 0 | 0 | 0 | 1 | 0 | 0 | 0 | 0 | 0 | 0 | 0 | 0 | 0 | 0 | 0 | 0 | 0 | 0 |
| Senna_obtusifolia | 0 | 0 | 0 | 0 | 0 | 0 | 0 | 0 | 0 | 5 | 0 | 0 | 1 | 4 | 1 | 0 | 7 | 0 | 0 | 0 | 0 | 0 | 0 | 0 | 0 | 0 | 0 |
| Cnidoscolus_urens | 0 | 0 | 0 | 0 | 0 | 0 | 0 | 0 | 0 | 0 | 1 | 0 | 0 | 0 | 0 | 0 | 0 | 0 | 0 | 0 | 0 | 0 | 0 | 0 | 0 | 0 | 0 |
| Commelina_erecta | 0 | 0 | 0 | 1 | 0 | 0 | 0 | 0 | 0 | 0 | 1 | 0 | 1 | 1 | 0 | 0 | 0 | 0 | 0 | 0 | 0 | 0 | 0 | 0 | 0 | 0 | 0 |
| Ludwigia_decurrens | 0 | 0 | 1 | 0 | 0 | 0 | 0 | 0 | 0 | 0 | 0 | 0 | 0 | 0 | 0 | 0 | 0 | 0 | 0 | 0 | 0 | 0 | 0 | 0 | 0 | 0 | 0 |
| Ludwigia_erecta | 0 | 0 | 1 | 0 | 0 | 0 | 0 | 0 | 0 | 0 | 0 | 0 | 0 | 0 | 0 | 0 | 0 | 0 | 0 | 2 | 0 | 0 | 0 | 0 | 0 | 0 | 0 |
| Ludwigia_octovalvis | 0 | 0 | 0 | 0 | 0 | 0 | 0 | 0 | 0 | 3 | 1 | 0 | 1 | 3 | 0 | 0 | 0 | 0 | 0 | 0 | 0 | 0 | 0 | 0 | 0 | 0 | 0 |
| Capsicum_annuum | 0 | 0 | 0 | 0 | 0 | 0 | 0 | 0 | 0 | 0 | 1 | 0 | 0 | 0 | 0 | 0 | 0 | 0 | 0 | 0 | 0 | 0 | 0 | 0 | 0 | 0 | 0 |
| Isertia_haenkeana | 0 | 0 | 0 | 0 | 0 | 0 | 0 | 0 | 0 | 0 | 0 | 0 | 0 | 0 | 0 | 1 | 0 | 0 | 0 | 0 | 0 | 2 | 0 | 0 | 0 | 0 | 0 |
| Murdannia_keisak | 0 | 1 | 0 | 0 | 0 | 0 | 0 | 0 | 0 | 0 | 0 | 0 | 0 | 0 | 0 | 0 | 0 | 0 | 0 | 0 | 0 | 0 | 0 | 0 | 0 | 0 | 0 |
| Richardia_Brasil | 0 | 15 | 0 | 5 | 0 | 0 | 0 | 1 | 0 | 4 | 1 | 0 | 0 | 4 | 0 | 0 | 0 | 0 | 0 | 0 | 0 | 0 | 0 | 0 | 0 | 0 | 0 |
| Sida_cerradoensis | 0 | 1 | 0 | 0 | 0 | 0 | 0 | 0 | 0 | 0 | 0 | 0 | 0 | 0 | 0 | 0 | 0 | 0 | 0 | 0 | 0 | 0 | 0 | 0 | 0 | 0 | 0 |
| Spermacoce_densiflora | 0 | 1 | 0 | 1 | 0 | 0 | 0 | 0 | 0 | 0 | 1 | 0 | 1 | 1 | 0 | 0 | 0 | 0 | 0 | 1 | 0 | 0 | 0 | 0 | 0 | 0 | 0 |
| Thalia_geniculata | 0 | 0 | 0 | 0 | 0 | 0 | 0 | 0 | 0 | 1 | 0 | 0 | 0 | 28 | 0 | 0 | 0 | 0 | 0 | 0 | 0 | 0 | 0 | 0 | 0 | 0 | 0 |
| Alternanthera_halimifolia | 0 | 0 | 0 | 0 | 0 | 0 | 0 | 0 | 0 | 0 | 0 | 0 | 5 | 0 | 0 | 0 | 0 | 1 | 0 | 0 | 0 | 0 | 0 | 0 | 0 | 0 | 0 |
| Corchorus_aestuans | 0 | 0 | 0 | 1 | 0 | 0 | 0 | 0 | 0 | 1 | 0 | 0 | 1 | 0 | 0 | 0 | 0 | 0 | 0 | 0 | 0 | 0 | 0 | 0 | 0 | 0 | 0 |
| Cuphea_carthagenensis | 0 | 0 | 0 | 0 | 0 | 0 | 0 | 0 | 0 | 0 | 0 | 0 | 0 | 0 | 0 | 0 | 0 | 0 | 0 | 0 | 1 | 0 | 0 | 0 | 0 | 0 | 0 |
| Heliotropium_indicum | 0 | 1 | 0 | 0 | 0 | 0 | 0 | 0 | 0 | 1 | 0 | 0 | 0 | 1 | 0 | 0 | 0 | 0 | 0 | 3 | 0 | 0 | 0 | 0 | 0 | 0 | 0 |
| Citrus_limon | 0 | 0 | 1 | 0 | 0 | 0 | 1 | 0 | 0 | 3 | 2 | 0 | 0 | 3 | 0 | 0 | 3 | 0 | 0 | 0 | 0 | 0 | 0 | 0 | 0 | 1 | 3 |
| Funastrum_clausum | 0 | 0 | 0 | 0 | 0 | 0 | 0 | 0 | 0 | 0 | 0 | 0 | 4 | 0 | 0 | 0 | 0 | 0 | 0 | 0 | 0 | 0 | 0 | 0 | 0 | 0 | 0 |
| Hydrolea_spinosa | 0 | 0 | 0 | 0 | 0 | 0 | 1 | 0 | 0 | 0 | 0 | 0 | 0 | 0 | 0 | 0 | 0 | 0 | 0 | 0 | 0 | 0 | 0 | 0 | 0 | 0 | 0 |
| Melothria_scabra | 0 | 0 | 0 | 0 | 0 | 0 | 0 | 0 | 1 | 0 | 0 | 0 | 0 | 0 | 0 | 0 | 0 | 0 | 0 | 0 | 1 | 0 | 0 | 0 | 0 | 0 | 0 |
| Mikania_sp. | 0 | 0 | 0 | 0 | 0 | 0 | 0 | 0 | 0 | 0 | 0 | 0 | 7 | 0 | 0 | 0 | 0 | 0 | 0 | 0 | 0 | 0 | 0 | 0 | 0 | 0 | 0 |
| Galinsoga_quadriradiata | 0 | 0 | 0 | 0 | 0 | 0 | 0 | 0 | 0 | 0 | 0 | 0 | 0 | 1 | 0 | 0 | 0 | 0 | 0 | 0 | 1 | 0 | 0 | 0 | 1 | 0 | 0 |
| Hyptis_suaveolens | 0 | 0 | 0 | 1 | 0 | 0 | 0 | 0 | 0 | 0 | 2 | 0 | 0 | 1 | 0 | 0 | 0 | 1 | 0 | 0 | 0 | 0 | 0 | 0 | 1 | 0 | 0 |
| Cissus_sp. | 0 | 0 | 2 | 0 | 0 | 0 | 0 | 0 | 0 | 0 | 0 | 0 | 0 | 0 | 0 | 0 | 0 | 0 | 0 | 0 | 0 | 0 | 0 | 0 | 0 | 0 | 0 |
| Ludwigia_peruviana | 1 | 0 | 0 | 0 | 0 | 0 | 0 | 0 | 0 | 5 | 0 | 0 | 2 | 10 | 0 | 0 | 0 | 0 | 0 | 0 | 0 | 0 | 0 | 0 | 0 | 0 | 0 |
| Melochia_corchorifolia | 0 | 0 | 0 | 4 | 0 | 0 | 0 | 0 | 0 | 1 | 0 | 0 | 0 | 0 | 0 | 0 | 0 | 0 | 0 | 0 | 0 | 0 | 0 | 0 | 0 | 0 | 0 |

- WP plant–butterfly matrix

|  | Anartia_amathea | Anartia_jatrophae | Battus_polydamas | Burnsius_orcus | Chioides_catillus | Danaus_gilippus | Euptoieta_hegesia | Eurema_albula | Hedone_vibex | Heliopetes_alana | Heraclides_thoas | Phoebis_sennae | Pyrisitia_venusta | Spicauda_procne | Gorgythion_begga | Hermeuptychia_hermes | Junonia_evarete | Agraulis_vanillae | Cogia_calchas | Dryadula_phaetusa | Aricoris_erostratus | Calephelis_iris | Staphylus_sp1. | Mestra_hersilia |
| --- | --- | --- | --- | --- | --- | --- | --- | --- | --- | --- | --- | --- | --- | --- | --- | --- | --- | --- | --- | --- | --- | --- | --- | --- |
| Alternanthera_halimifolia | 1 | 2 | 0 | 0 | 0 | 0 | 0 | 0 | 0 | 0 | 0 | 0 | 0 | 0 | 0 | 0 | 4 | 0 | 0 | 0 | 0 | 0 | 6 | 0 |
| Calopogonium_mucunoides | 1 | 0 | 0 | 5 | 0 | 0 | 0 | 1 | 71 | 12 | 0 | 0 | 13 | 119 | 0 | 0 | 4 | 0 | 0 | 0 | 0 | 0 | 0 | 0 |
| Gouania_rosei | 5 | 0 | 1 | 0 | 0 | 0 | 0 | 0 | 0 | 0 | 0 | 0 | 0 | 0 | 0 | 0 | 0 | 0 | 0 | 0 | 0 | 0 | 0 | 0 |
| Lantana_camara | 0 | 0 | 3 | 0 | 0 | 0 | 0 | 0 | 0 | 0 | 0 | 0 | 0 | 0 | 0 | 0 | 0 | 0 | 0 | 0 | 0 | 0 | 0 | 0 |
| Malachra_alceifolia | 10 | 7 | 5 | 4 | 1 | 1 | 0 | 1 | 139 | 15 | 0 | 12 | 1 | 83 | 0 | 0 | 11 | 2 | 0 | 3 | 0 | 0 | 0 | 0 |
| Melochia_parvifolia | 4 | 3 | 11 | 1 | 0 | 0 | 0 | 0 | 8 | 0 | 2 | 0 | 0 | 18 | 0 | 0 | 0 | 0 | 1 | 0 | 0 | 0 | 0 | 0 |
| Momordica_charantia | 1 | 5 | 0 | 0 | 0 | 0 | 0 | 0 | 11 | 3 | 0 | 2 | 1 | 10 | 0 | 0 | 2 | 0 | 0 | 0 | 0 | 0 | 2 | 0 |
| Senna_obtusifolia | 1 | 0 | 0 | 0 | 0 | 0 | 0 | 0 | 5 | 1 | 0 | 0 | 0 | 0 | 0 | 3 | 1 | 0 | 0 | 0 | 0 | 0 | 0 | 0 |
| Sida_acuta | 0 | 2 | 1 | 8 | 0 | 0 | 1 | 0 | 52 | 10 | 0 | 1 | 4 | 6 | 0 | 0 | 2 | 0 | 0 | 0 | 1 | 0 | 0 | 0 |
| Citrus_limon | 0 | 0 | 0 | 0 | 0 | 0 | 0 | 0 | 2 | 0 | 0 | 1 | 0 | 4 | 0 | 0 | 0 | 0 | 0 | 0 | 0 | 0 | 0 | 0 |
| Heliotropium_indicum | 0 | 0 | 0 | 1 | 0 | 1 | 0 | 0 | 1 | 0 | 0 | 0 | 0 | 1 | 0 | 0 | 0 | 0 | 0 | 0 | 0 | 0 | 0 | 0 |
| Sida_sp. | 0 | 0 | 0 | 1 | 1 | 0 | 0 | 0 | 18 | 0 | 0 | 0 | 0 | 3 | 0 | 0 | 0 | 0 | 0 | 1 | 0 | 0 | 0 | 0 |
| Simarouba_amara | 0 | 0 | 1 | 0 | 0 | 0 | 0 | 0 | 0 | 0 | 0 | 0 | 0 | 0 | 0 | 0 | 0 | 0 | 0 | 0 | 0 | 0 | 0 | 0 |
| Spermacoce_densiflora | 0 | 1 | 0 | 0 | 0 | 0 | 0 | 0 | 0 | 2 | 0 | 0 | 0 | 0 | 1 | 0 | 1 | 0 | 0 | 0 | 0 | 0 | 0 | 0 |
| Torenia_crustacea | 0 | 0 | 0 | 0 | 0 | 0 | 0 | 0 | 0 | 0 | 0 | 0 | 0 | 0 | 0 | 0 | 1 | 0 | 0 | 0 | 0 | 0 | 0 | 0 |
| Aeschynomene_americana | 0 | 0 | 0 | 0 | 0 | 0 | 0 | 0 | 0 | 1 | 0 | 0 | 1 | 0 | 0 | 0 | 0 | 0 | 0 | 0 | 0 | 0 | 0 | 0 |
| Corchorus_aestuans | 0 | 0 | 0 | 0 | 0 | 0 | 0 | 0 | 1 | 1 | 0 | 0 | 0 | 0 | 0 | 0 | 0 | 0 | 0 | 0 | 0 | 0 | 0 | 0 |
| Crotalaria_spectabilis | 0 | 0 | 0 | 0 | 0 | 0 | 0 | 0 | 0 | 0 | 0 | 0 | 0 | 1 | 0 | 0 | 0 | 0 | 0 | 0 | 0 | 0 | 0 | 0 |
| Desmodium_incanum | 0 | 0 | 0 | 1 | 1 | 0 | 0 | 0 | 1 | 0 | 0 | 0 | 0 | 0 | 0 | 0 | 1 | 0 | 0 | 0 | 0 | 0 | 0 | 0 |
| Desmodium_scorpiurus | 0 | 0 | 0 | 0 | 0 | 0 | 0 | 0 | 0 | 0 | 0 | 0 | 1 | 0 | 0 | 0 | 0 | 0 | 0 | 0 | 0 | 0 | 0 | 0 |
| Galictia_sp. | 0 | 0 | 0 | 1 | 1 | 0 | 0 | 0 | 1 | 0 | 0 | 0 | 0 | 3 | 0 | 0 | 1 | 0 | 0 | 0 | 0 | 0 | 0 | 0 |
| Melochia_corchorifolia | 0 | 0 | 0 | 4 | 0 | 0 | 0 | 0 | 0 | 1 | 0 | 0 | 0 | 3 | 0 | 0 | 0 | 0 | 0 | 0 | 0 | 0 | 0 | 0 |
| Melothria_scabra | 0 | 0 | 0 | 0 | 0 | 0 | 0 | 0 | 0 | 0 | 0 | 0 | 2 | 0 | 0 | 0 | 0 | 0 | 0 | 0 | 0 | 1 | 0 | 0 |
| Sida_cerradoensis | 0 | 0 | 0 | 0 | 0 | 0 | 0 | 0 | 0 | 0 | 0 | 1 | 0 | 0 | 0 | 0 | 0 | 0 | 0 | 0 | 0 | 0 | 0 | 0 |
| Thalia_geniculata | 0 | 0 | 0 | 0 | 0 | 0 | 0 | 0 | 1 | 0 | 0 | 0 | 0 | 125 | 0 | 0 | 0 | 0 | 0 | 0 | 0 | 0 | 0 | 1 |
| Limnocharis_flava | 0 | 0 | 0 | 0 | 0 | 0 | 0 | 0 | 0 | 0 | 0 | 1 | 0 | 1 | 0 | 0 | 0 | 0 | 0 | 0 | 0 | 0 | 0 | 0 |
| Capsicum_annuum | 1 | 0 | 0 | 0 | 0 | 0 | 0 | 0 | 0 | 0 | 0 | 0 | 0 | 0 | 0 | 0 | 0 | 0 | 0 | 0 | 0 | 0 | 0 | 0 |
| Commelina_erecta | 0 | 0 | 0 | 0 | 0 | 0 | 0 | 0 | 0 | 0 | 0 | 0 | 0 | 1 | 0 | 0 | 0 | 0 | 0 | 0 | 0 | 0 | 0 | 0 |
| Cucumis_melo | 0 | 0 | 0 | 0 | 0 | 0 | 0 | 0 | 0 | 0 | 0 | 0 | 0 | 0 | 0 | 0 | 1 | 0 | 0 | 0 | 0 | 0 | 0 | 0 |
| Lippia_dulcis | 0 | 36 | 0 | 0 | 0 | 0 | 0 | 0 | 0 | 0 | 0 | 0 | 0 | 0 | 1 | 0 | 91 | 0 | 0 | 0 | 0 | 0 | 1 | 0 |
| Ludwigia_erecta | 0 | 2 | 0 | 0 | 0 | 0 | 0 | 0 | 0 | 0 | 0 | 0 | 0 | 0 | 0 | 0 | 2 | 0 | 0 | 0 | 0 | 0 | 0 | 0 |
| Spermacoce_remota | 0 | 0 | 0 | 0 | 0 | 0 | 0 | 0 | 0 | 0 | 0 | 0 | 0 | 0 | 0 | 0 | 2 | 0 | 0 | 0 | 0 | 0 | 1 | 0 |
| Combretum_fruticosum | 0 | 0 | 1 | 0 | 0 | 0 | 0 | 0 | 0 | 0 | 0 | 0 | 0 | 0 | 0 | 0 | 0 | 0 | 0 | 0 | 0 | 0 | 0 | 0 |
| Heliotropium_cuspidatum | 0 | 0 | 3 | 0 | 0 | 0 | 0 | 0 | 1 | 0 | 0 | 0 | 0 | 1 | 0 | 0 | 0 | 0 | 0 | 0 | 0 | 0 | 0 | 0 |
| Lecythis_minor | 0 | 0 | 1 | 0 | 0 | 0 | 0 | 0 | 0 | 0 | 0 | 0 | 0 | 0 | 0 | 0 | 0 | 0 | 0 | 0 | 0 | 0 | 0 | 0 |
| Cissus_sp. | 1 | 0 | 1 | 0 | 0 | 0 | 0 | 0 | 0 | 0 | 0 | 0 | 0 | 0 | 0 | 0 | 0 | 0 | 0 | 9 | 0 | 0 | 0 | 0 |
| Funastrum_clausum | 0 | 6 | 0 | 0 | 0 | 0 | 0 | 0 | 0 | 0 | 0 | 0 | 0 | 2 | 0 | 0 | 0 | 0 | 0 | 0 | 0 | 0 | 0 | 0 |
| Richardia_Brasil | 0 | 0 | 0 | 0 | 0 | 0 | 0 | 0 | 0 | 0 | 0 | 0 | 0 | 1 | 0 | 0 | 2 | 0 | 0 | 0 | 0 | 0 | 0 | 0 |

- OP plant–butterfly matrix

|  | Anartia_amathea | Anartia_jatrophae | Battus_polydamas | Burnsius_orcus | Chioides_catillus | Chlosyne_lacinia | Danaus_gilippus | Dryadula_phaetusa | Hedone_vibex | Heliconius_erato | Heliopetes_alana | Junonia_evarete | Ministrymon_una | Parides_anchises | Phoebis_sennae | Pyrisitia_venusta | Spicauda_procne | Ascia_monuste | Eurema_albula | Hemiargus_hanno | Hermeuptychia_hermes | Cogia_calchas | Euptoieta_hegesia | Spicauda_teleus | Staphylus_sp1. | Aricoris_erostratus | Eurema_daira |
| --- | --- | --- | --- | --- | --- | --- | --- | --- | --- | --- | --- | --- | --- | --- | --- | --- | --- | --- | --- | --- | --- | --- | --- | --- | --- | --- | --- |
| Abutilon_sp. | 0 | 0 | 0 | 0 | 0 | 0 | 0 | 0 | 0 | 1 | 0 | 0 | 0 | 0 | 3 | 0 | 1 | 0 | 0 | 0 | 0 | 0 | 0 | 0 | 0 | 0 | 0 |
| Asclepias_curassavica | 0 | 0 | 0 | 0 | 0 | 0 | 2 | 0 | 0 | 0 | 0 | 0 | 0 | 0 | 0 | 0 | 0 | 0 | 0 | 0 | 0 | 0 | 0 | 0 | 0 | 0 | 0 |
| Calopogonium_mucunoides | 0 | 1 | 1 | 0 | 0 | 0 | 0 | 0 | 44 | 0 | 6 | 11 | 0 | 0 | 0 | 0 | 92 | 0 | 0 | 0 | 0 | 0 | 0 | 0 | 0 | 0 | 0 |
| Crotalaria_spectabilis | 0 | 0 | 0 | 0 | 0 | 0 | 1 | 0 | 0 | 0 | 0 | 0 | 0 | 0 | 1 | 0 | 0 | 0 | 0 | 0 | 0 | 0 | 0 | 0 | 0 | 0 | 0 |
| Desmodium_incanum | 0 | 0 | 0 | 2 | 0 | 0 | 0 | 0 | 2 | 0 | 1 | 1 | 0 | 0 | 0 | 0 | 8 | 0 | 0 | 0 | 1 | 0 | 0 | 0 | 0 | 0 | 0 |
| Galinsoga_quadriradiata | 0 | 0 | 0 | 0 | 0 | 1 | 0 | 0 | 2 | 0 | 0 | 3 | 1 | 0 | 0 | 1 | 0 | 0 | 0 | 0 | 0 | 0 | 0 | 0 | 0 | 0 | 0 |
| Ipomoea_muricata | 0 | 0 | 1 | 0 | 0 | 0 | 1 | 0 | 0 | 0 | 0 | 0 | 0 | 0 | 3 | 0 | 3 | 0 | 0 | 0 | 0 | 0 | 0 | 0 | 0 | 0 | 0 |
| Lantana_camara | 8 | 0 | 0 | 0 | 0 | 0 | 0 | 2 | 0 | 1 | 0 | 0 | 0 | 1 | 4 | 0 | 0 | 0 | 0 | 0 | 0 | 0 | 0 | 0 | 0 | 0 | 0 |
| Ludwigia_peruviana | 0 | 0 | 0 | 0 | 0 | 0 | 0 | 1 | 0 | 0 | 4 | 0 | 0 | 0 | 1 | 0 | 0 | 0 | 0 | 0 | 0 | 0 | 0 | 0 | 0 | 0 | 0 |
| Macroptilium_lathyroides | 0 | 0 | 0 | 0 | 0 | 0 | 0 | 0 | 0 | 0 | 0 | 0 | 0 | 0 | 2 | 0 | 0 | 0 | 0 | 0 | 0 | 0 | 0 | 0 | 0 | 0 | 0 |
| Malachra_alceifolia | 1 | 3 | 0 | 0 | 0 | 1 | 2 | 1 | 20 | 0 | 0 | 37 | 0 | 1 | 8 | 0 | 36 | 0 | 0 | 0 | 0 | 2 | 0 | 0 | 0 | 0 | 0 |
| Malachra_fasciata | 0 | 0 | 0 | 0 | 0 | 0 | 0 | 0 | 0 | 0 | 0 | 0 | 0 | 0 | 1 | 0 | 0 | 0 | 0 | 0 | 0 | 0 | 0 | 0 | 0 | 0 | 0 |
| Melochia_corchorifolia | 0 | 1 | 0 | 2 | 0 | 0 | 0 | 1 | 2 | 0 | 1 | 0 | 0 | 0 | 0 | 0 | 7 | 0 | 0 | 0 | 0 | 0 | 0 | 0 | 0 | 0 | 0 |
| Melochia_parvifolia | 3 | 10 | 18 | 1 | 6 | 0 | 44 | 9 | 6 | 0 | 1 | 29 | 0 | 2 | 2 | 0 | 58 | 0 | 0 | 0 | 0 | 0 | 0 | 0 | 0 | 0 | 0 |
| Momordica_charantia | 0 | 1 | 0 | 2 | 0 | 0 | 0 | 2 | 11 | 0 | 0 | 0 | 0 | 0 | 1 | 0 | 12 | 0 | 0 | 0 | 0 | 0 | 0 | 0 | 0 | 0 | 0 |
| Senna_obtusifolia | 0 | 0 | 0 | 0 | 0 | 0 | 0 | 0 | 1 | 0 | 0 | 1 | 0 | 0 | 1 | 0 | 2 | 0 | 0 | 0 | 1 | 0 | 0 | 0 | 0 | 0 | 0 |
| Sida_acuta | 0 | 12 | 0 | 81 | 0 | 0 | 5 | 9 | 14 | 0 | 15 | 2 | 0 | 0 | 1 | 0 | 6 | 0 | 1 | 2 | 0 | 0 | 0 | 0 | 0 | 0 | 1 |
| Centrosema_virginianum | 0 | 0 | 0 | 0 | 0 | 0 | 0 | 0 | 8 | 0 | 0 | 0 | 0 | 0 | 0 | 0 | 0 | 0 | 0 | 0 | 0 | 0 | 0 | 0 | 0 | 0 | 0 |
| Funastrum_clausum | 0 | 1 | 0 | 0 | 0 | 0 | 0 | 6 | 4 | 0 | 0 | 7 | 0 | 0 | 0 | 0 | 7 | 0 | 0 | 0 | 0 | 0 | 0 | 0 | 0 | 0 | 0 |
| Galictia_sp. | 0 | 9 | 0 | 1 | 0 | 0 | 0 | 0 | 69 | 0 | 2 | 30 | 0 | 0 | 0 | 1 | 99 | 0 | 0 | 0 | 0 | 0 | 0 | 0 | 0 | 0 | 1 |
| Melothria_scabra | 0 | 0 | 0 | 0 | 0 | 0 | 0 | 0 | 0 | 0 | 0 | 0 | 0 | 0 | 0 | 0 | 1 | 0 | 0 | 0 | 0 | 0 | 0 | 0 | 0 | 0 | 0 |
| Thalia_geniculata | 0 | 2 | 0 | 0 | 0 | 0 | 0 | 0 | 1 | 0 | 0 | 0 | 0 | 0 | 0 | 0 | 44 | 0 | 0 | 0 | 0 | 0 | 0 | 0 | 0 | 0 | 0 |
| Acmella_alba | 0 | 1 | 0 | 7 | 0 | 1 | 0 | 0 | 19 | 0 | 0 | 19 | 0 | 0 | 0 | 0 | 6 | 0 | 0 | 0 | 0 | 0 | 0 | 0 | 0 | 0 | 0 |
| Aeschynomene_americana | 0 | 0 | 0 | 0 | 0 | 0 | 0 | 0 | 1 | 0 | 0 | 0 | 0 | 0 | 0 | 0 | 0 | 0 | 0 | 5 | 0 | 0 | 0 | 0 | 0 | 0 | 0 |
| Asystasia_intrusa | 0 | 0 | 0 | 0 | 0 | 0 | 0 | 0 | 26 | 0 | 0 | 1 | 0 | 0 | 0 | 0 | 16 | 0 | 0 | 0 | 0 | 3 | 0 | 0 | 0 | 0 | 0 |
| Corchorus_aestuans | 0 | 0 | 0 | 0 | 0 | 0 | 0 | 0 | 1 | 0 | 0 | 2 | 0 | 0 | 0 | 0 | 7 | 0 | 0 | 0 | 0 | 0 | 0 | 0 | 0 | 0 | 0 |
| Heliotropium_indicum | 0 | 0 | 0 | 0 | 0 | 0 | 1 | 1 | 0 | 0 | 0 | 0 | 0 | 0 | 0 | 0 | 0 | 0 | 0 | 0 | 0 | 0 | 0 | 0 | 0 | 0 | 0 |
| Hydrolea_spinosa | 0 | 0 | 0 | 0 | 0 | 0 | 2 | 11 | 1 | 0 | 1 | 8 | 0 | 0 | 0 | 2 | 5 | 1 | 0 | 15 | 0 | 0 | 0 | 0 | 0 | 0 | 0 |
| Ludwigia_erecta | 0 | 0 | 0 | 0 | 0 | 0 | 0 | 1 | 0 | 0 | 0 | 0 | 0 | 0 | 0 | 0 | 1 | 0 | 0 | 4 | 0 | 0 | 0 | 0 | 0 | 0 | 0 |
| Ludwigia_octovalvis | 0 | 0 | 0 | 0 | 0 | 0 | 0 | 0 | 0 | 0 | 0 | 0 | 0 | 0 | 0 | 0 | 5 | 1 | 0 | 0 | 0 | 0 | 0 | 0 | 0 | 0 | 0 |
| Cuphea_carthagenensis | 0 | 1 | 0 | 3 | 0 | 0 | 0 | 0 | 0 | 0 | 0 | 0 | 0 | 0 | 0 | 0 | 0 | 0 | 0 | 0 | 0 | 0 | 0 | 0 | 0 | 0 | 0 |
| Nymphoides_sp. | 0 | 6 | 0 | 0 | 0 | 0 | 0 | 0 | 0 | 0 | 0 | 0 | 0 | 0 | 0 | 0 | 0 | 0 | 0 | 0 | 0 | 0 | 0 | 0 | 0 | 0 | 0 |
| Richardia_Brasil | 0 | 1 | 0 | 4 | 0 | 0 | 0 | 0 | 0 | 0 | 0 | 0 | 0 | 0 | 0 | 0 | 1 | 0 | 0 | 0 | 0 | 0 | 0 | 0 | 0 | 0 | 0 |
| Sida_sp. | 0 | 0 | 0 | 1 | 0 | 0 | 0 | 0 | 1 | 0 | 0 | 0 | 0 | 0 | 0 | 0 | 0 | 0 | 0 | 0 | 0 | 0 | 0 | 0 | 0 | 0 | 0 |
| Cnidoscolus_urens | 0 | 3 | 2 | 1 | 0 | 0 | 0 | 4 | 3 | 0 | 0 | 1 | 0 | 0 | 0 | 0 | 18 | 1 | 0 | 0 | 1 | 0 | 0 | 0 | 0 | 0 | 0 |
| Commelina_erecta | 0 | 1 | 0 | 0 | 0 | 0 | 0 | 1 | 0 | 0 | 0 | 0 | 0 | 0 | 0 | 0 | 0 | 0 | 0 | 0 | 0 | 0 | 0 | 0 | 0 | 0 | 0 |
| Cucumis_melo | 0 | 2 | 0 | 0 | 0 | 0 | 1 | 4 | 7 | 0 | 0 | 3 | 0 | 0 | 3 | 1 | 1 | 0 | 0 | 0 | 0 | 0 | 0 | 1 | 1 | 1 | 1 |
| Eleutheranthera_ruderalis | 0 | 0 | 0 | 1 | 0 | 0 | 0 | 0 | 0 | 0 | 0 | 0 | 0 | 0 | 0 | 0 | 0 | 0 | 0 | 0 | 0 | 0 | 0 | 0 | 0 | 0 | 0 |
| Euphorbia_heterophylla | 0 | 2 | 0 | 0 | 0 | 0 | 0 | 2 | 0 | 0 | 0 | 1 | 0 | 0 | 0 | 0 | 0 | 0 | 0 | 0 | 0 | 0 | 0 | 0 | 0 | 0 | 0 |
| Lippia_dulcis | 0 | 193 | 0 | 2 | 0 | 0 | 0 | 10 | 35 | 0 | 7 | 142 | 0 | 0 | 0 | 0 | 30 | 0 | 0 | 0 | 1 | 0 | 0 | 0 | 0 | 1 | 0 |
| Melampodium_divaricatum | 0 | 0 | 0 | 0 | 0 | 0 | 0 | 0 | 0 | 0 | 0 | 0 | 0 | 0 | 0 | 0 | 0 | 0 | 0 | 0 | 0 | 0 | 1 | 0 | 0 | 0 | 0 |
| Mikania_sp. | 0 | 0 | 0 | 0 | 0 | 0 | 0 | 0 | 1 | 0 | 0 | 1 | 0 | 0 | 0 | 0 | 0 | 0 | 0 | 0 | 0 | 0 | 0 | 0 | 0 | 0 | 0 |
| Physalis_angulata | 0 | 0 | 0 | 0 | 0 | 0 | 0 | 0 | 0 | 0 | 0 | 1 | 0 | 0 | 0 | 0 | 0 | 0 | 0 | 0 | 0 | 0 | 0 | 0 | 0 | 0 | 0 |
| Tarenaya_hassleriana | 0 | 0 | 0 | 0 | 0 | 0 | 0 | 0 | 1 | 0 | 0 | 1 | 0 | 0 | 0 | 0 | 1 | 0 | 0 | 0 | 0 | 0 | 0 | 1 | 0 | 0 | 0 |
| Citrus_limon | 0 | 0 | 0 | 0 | 0 | 0 | 0 | 0 | 0 | 0 | 0 | 0 | 0 | 0 | 0 | 0 | 0 | 3 | 0 | 0 | 0 | 0 | 0 | 0 | 0 | 0 | 0 |
| Portulaca_oleracea | 0 | 0 | 0 | 0 | 0 | 0 | 0 | 0 | 0 | 0 | 1 | 0 | 0 | 0 | 0 | 0 | 0 | 0 | 0 | 0 | 0 | 0 | 0 | 0 | 0 | 0 | 0 |

Table S5. Summary of principal component analysis (PCA) results used to derive the interactive role index (PC1) for butterflies and plants for the three cattle pasture management systems—forest-adjacent pastures (FAP), wooded pastures (WP), and open pastures (OP).

**Plants FAP**

| Importance of components: | |  |  |
| --- | --- | --- | --- |
|  | PC1 | PC2 | PC3 |
| Standard deviation | 1.574 | 0.6119 | 0.38416 |
| Proportion of variance | 0.826 | 0.1248 | 0.04919 |
| Cumulative proportion | 0.826 | 0.9508 | 1 |

**Butterflies FAP**

| Importance of components: | |  |  |
| --- | --- | --- | --- |
|  | PC1 | PC2 | PC3 |
| Standard deviation | 1.5763 | 0.5857 | 0.41508 |
| Proportion of variance | 0.8282 | 0.1143 | 0.05743 |
| Cumulative proportion | 0.8282 | 0.9426 | 1 |

**Plants WP**

| Importance of components: | |  |  |
| --- | --- | --- | --- |
|  | PC1 | PC2 | PC3 |
| Standard deviation | 1.6549 | 0.44742 | 0.24717 |
| Proportion of variance | 0.9129 | 0.06673 | 0.02036 |
| Cumulative proportion | 0.9129 | 0.97964 | 1 |

**Butterflies WP**

| Importance of components: | |  |  |
| --- | --- | --- | --- |
|  | PC1 | PC2 | PC3 |
| Standard deviation | 1.584 | 0.5663 | 0.41383 |
| Proportion of variance | 0.836 | 0.1069 | 0.05708 |
| Cumulative proportion | 0.836 | 0.9429 | 1 |

**Plants OP**

| Importance of components: | |  |  |
| --- | --- | --- | --- |
|  | PC1 | PC2 | PC3 |
| Standard deviation | 1.5733 | 0.667 | 0.28252 |
| Proportion of variance | 0.8251 | 0.1483 | 0.02661 |
| Cumulative proportion | 0.8251 | 0.9734 | 1 |

**Butterflies OP**

| Importance of components: | |  |  |
| --- | --- | --- | --- |
|  | PC1 | PC2 | PC3 |
| Standard deviation | 1.5776 | 0.665 | 0.2627 |
| Proportion of variance | 0.8296 | 0.1474 | 0.023 |
| Cumulative proportion | 0.8296 | 0.977 | 1 |

Table S6. Trait dataset for plant species recorded in plant–butterfly networks across forest-adjacent pastures (FAP), wooded pastures (WP), and open pastures (OP). For each species we provide interaction frequency, interactive role (PC1), origin (native/exotic), corolla type, color, and shape, together with quantitative corolla measurements (width and length with associated standard deviations). Trait values were obtained from field measurements or validated through herbarium and digital reference collections.

| Species | Management | Interaction frecuency | Role (PC1) | Origin | Corolla type | Color | Shape | Corolla width (mm) | SD_Corolla width (mm) | Corolla length (mm) | SD_Corolla length (mm) |
| --- | --- | --- | --- | --- | --- | --- | --- | --- | --- | --- | --- |
| *Aeschynomene americana* | FAP | 1 | 1.96 | native | dialipetalous | yellow | papilionaceous flower | 9.64 | 0.68 | 8.74 | 0.64 |
| *Alternanthera halimifolia* | FAP | 6 | 0.65 | native | achlamydeous | white | achlamydeous | 1.98 | 0.23 | 2.88 | 0.32 |
| *Calopogonium mucunoides* | FAP | 53 | 1.99 | native | dialipetalous | purple | papilionaceous flower | 7.88 | 0.67 | 11.01 | 0.58 |
| *Capsicum annuum* | FAP | 1 | 1.06 | native | gamopetalous | white | rotaceous | 10.25 | 0.05 | 2.13 | 0.92 |
| *Cissus sp.* | FAP | 2 | 1.37 | native | gamopetalous | yellow | bell-shaped to urn-shaped | 1.50 |  | 1.50 |  |
| *Citrus limon* | FAP | 17 | 2.17 | exotic | dialipetalous | white | rotaceous | 18.09 | 2.01 | 3.19 | 0.79 |
| *Cnidoscolus urens* | FAP | 1 | 1.06 | native | achlamydeous | white | rotaceous | 4.85 | 0.90 | 4.39 | 0.27 |
| *Commelina erecta* | FAP | 4 | 0.45 | native | dialipetalous | blue | zygomorphic | 19.09 | 4.28 | 5.16 | 1.42 |
| *Corchorus aestuans* | FAP | 3 | 0.17 | native | dialipetalous | yellow | rotaceous | 7.48 | 0.42 | 3.99 | 0.61 |
| *Croton hirtus* | FAP | 1 | 1.96 | native | dialipetalous | white | rotaceous | 2.41 | 0.56 | 1.22 | 0.21 |
| *Cuphea carthagenensis* | FAP | 1 | 1.51 | native | gamopetalous | purple | tubular | 5.72 |  | 7.05 | 0.87 |
| *Desmodium incanum* | FAP | 9 | 0.33 | native | dialipetalous | pink | papilionaceous flower | 6.91 | 0.94 | 6.52 | 0.86 |
| *Funastrum clausum* | FAP | 4 | 0.90 | native | gamopetalous | white | rotaceous | 15.49 | 3.34 | 4.99 | 1.00 |
| *Galinsoga quadriradiata* | FAP | 3 | 0.22 | native | gamopetalous | yellow | tubular | 13.66 | 1.51 | 3.94 | 0.96 |
| *Gouania rosei* | FAP | 1 | 0.90 | native | achlamydeous | white | petaloid calyx | 2.31 | 0.31 | 1.77 | 0.27 |
| *Heliotropium cuspidatum* | FAP | 1 | 1.47 | native | gamopetalous | white | salverform | 4.14 | 0.89 | 7.95 | 2.11 |
| *Heliotropium indicum* | FAP | 6 | 0.37 | native | gamopetalous | white | salverform | 4.44 | 0.29 | 4.93 | 1.02 |
| *Hydrolea spinosa* | FAP | 1 | 1.47 | native | gamopetalous | blue | rotaceous | 13.95 | 1.56 | 4.42 | 0.69 |
| *Hyptis suaveolens* | FAP | 6 | 0.29 | native | gamopetalous | purple | two-lipped | 4.47 | 0.59 | 7.33 | 1.11 |
| *Ipomoea muricata* | FAP | 1 | 1.37 | native | gamopetalous | lilac | bell-shaped | 29.10 | 2.90 | 27.67 | 4.36 |
| *Isertia haenkeana* | FAP | 3 | 1.56 | native | gamopetalous | red | salverform | 5.12 | 1.27 | 27.96 | 2.79 |
| *Lantana camara* | FAP | 9 | 0.13 | native | gamopetalous | orange | tubular | 5.70 | 0.83 | 10.15 | 1.29 |
| *Ludwigia decurrens* | FAP | 1 | 1.37 | native | dialipetalous | yellow | rotaceous | 29.75 | 2.20 | 3.35 | 1.37 |
| *Ludwigia erecta* | FAP | 3 | 1.05 | native | dialipetalous | yellow | rotaceous | 10.82 | 1.10 | 9.47 | 1.13 |
| *Ludwigia octovalvis* | FAP | 8 | 0.60 | native | dialipetalous | yellow | rotaceous | 23.70 | 2.32 | 5.44 | 1.76 |
| *Ludwigia peruviana* | FAP | 18 | 0.43 | native | dialipetalous | yellow | rotaceous | 30.00 |  | 9.14 |  |
| *Malachra alceifolia* | FAP | 186 | 4.89 | native | dialipetalous | yellow | rotaceous | 24.33 | 1.92 | 13.73 | 1.38 |
| *Melampodium divaricatum* | FAP | 5 | 1.39 | native | gamopetalous | yellow | tubular | 13.21 | 0.84 | 2.72 |  |
| *Melochia corchorifolia* | FAP | 5 | 0.56 | exotic | dialipetalous | pink | spatulate | 6.73 | 1.18 | 3.89 | 0.91 |
| *Melochia parvifolia* | FAP | 50 | 1.68 | native | dialipetalous | white | spatulate | 23.61 | 5.82 | 7.38 | 1.39 |
| *Melothria scabra* | FAP | 2 | 0.78 | native | dialipetalous | yellow | rotaceous | 6.02 | 0.51 | 2.82 | 0.47 |
| *Mikania sp.* | FAP | 7 | 0.90 | native | gamopetalous | white | tubular | 4.70 |  | 2.70 |  |
| *Momordica charantia* | FAP | 53 | 3.65 | exotic | dialipetalous | yellow | rotaceous | 29.55 | 1.48 | 6.11 | 1.91 |
| *Murdannia keisak* | FAP | 1 | 1.44 | exotic | dialipetalous | lilac | rotaceous | 8.50 |  | 0.40 |  |
| *Richardia Brasil* | FAP | 30 | 0.77 | native | gamopetalous | white | tubular | 4.79 | 1.05 | 4.60 | 0.71 |
| *Richardia scabra* | FAP | 5 | 0.90 | native | gamopetalous | white | tubular | 8.29 |  | 3.94 |  |
| *Senna obtusifolia* | FAP | 18 | 0.62 | native | dialipetalous | yellow | bell-shaped | 25.81 | 4.09 | 14.08 | 1.57 |
| *Sida acuta* | FAP | 200 | 4.12 | native | dialipetalous | yellow | rotaceous | 25.30 | 5.03 | 8.95 | 2.36 |
| *Sida cerradoensis* | FAP | 1 | 1.44 | native | dialipetalous | orange | rotaceous | 25.99 | 4.15 | 11.79 | 3.50 |
| *Sida sp.* | FAP | 52 | 1.87 | native | dialipetalous | white | rotaceous | 16.20 | 0.99 | 4.42 | 0.94 |
| *Spermacoce densiflora* | FAP | 6 | 1.28 | native | gamopetalous | white | tubular | 2.38 | 0.30 | 1.84 | 0.40 |
| *Thalia geniculata* | FAP | 29 | 0.51 | native | gamopetalous | purple | tubular | 4.00 |  | 16.73 | 7.12 |
| *Varronia inermis* | FAP | 2 | 1.15 | native | gamopetalous | white | salverform | 1.65 | 0.13 | 3.85 | 0.59 |
| *Aeschynomene americana* | WP | 2 | 1.07 | native | dialipetalous | yellow | papilionaceous flower | 9.64 | 0.68 | 8.74 | 0.64 |
| *Alternanthera halimifolia* | WP | 13 | 0.05 | native | achlamydeous | white | achlamydeous | 1.98 | 0.23 | 2.88 | 0.32 |
| *Calopogonium mucunoides* | WP | 226 | 2.62 | native | dialipetalous | purple | papilionaceous flower | 7.88 | 0.67 | 11.01 | 0.58 |
| *Capsicum annuum* | WP | 1 | 1.44 | native | gamopetalous | white | rotaceous | 10.25 | 0.05 | 2.13 | 0.92 |
| *Cissus sp.* | WP | 11 | 0.42 | native | gamopetalous | yellow | bell-shaped to urn-shaped | 1.50 |  | 1.50 |  |
| *Citrus limon* | WP | 7 | 0.12 | exotic | dialipetalous | white | rotaceous | 18.09 | 2.01 | 3.19 | 0.79 |
| *Combretum fruticosum* | WP | 1 | 1.38 | native | achlamydeous | yellow | achlamydeous | 4.53 |  | 5.10 |  |
| *Commelina erecta* | WP | 1 | 0.90 | native | dialipetalous | blue | zygomorphic | 19.09 | 4.28 | 5.16 | 1.42 |
| *Corchorus aestuans* | WP | 2 | 0.67 | native | dialipetalous | yellow | rotaceous | 7.48 | 0.42 | 3.99 | 0.61 |
| *Crotalaria spectabilis* | WP | 1 | 0.90 | exotic | dialipetalous | yellow | papilionaceous flower | 24.14 | 1.21 | 17.01 | 1.16 |
| *Cucumis melo* | WP | 1 | 1.04 | exotic | gamopetalous | yellow | rotaceous | 21.62 | 2.07 | 8.78 | 1.39 |
| *Desmodium incanum* | WP | 4 | 0.25 | native | dialipetalous | pink | papilionaceous flower | 6.91 | 0.94 | 6.52 | 0.86 |
| *Desmodium scorpiurus* | WP | 1 | 1.58 | native | dialipetalous | purple | papilionaceous flower | 4.00 |  | 4.00 |  |
| *Funastrum clausum* | WP | 8 | 0.33 | native | gamopetalous | white | rotaceous | 15.49 | 3.34 | 4.99 | 1.00 |
| *Galictia sp.* | WP | 7 | 0.84 | native | dialipetalous | purple | papilionaceous flower | 4.61 | 0.91 | 6.88 | 1.58 |
| *Gouania rosei* | WP | 6 | 0.72 | native | achlamydeous | white | petaloid calyx | 2.31 | 0.31 | 1.77 | 0.27 |
| *Heliotropium cuspidatum* | WP | 5 | 0.69 | native | gamopetalous | white | salverform | 4.14 | 0.89 | 7.95 | 2.11 |
| *Heliotropium indicum* | WP | 4 | 0.10 | native | gamopetalous | white | salverform | 4.44 | 0.29 | 4.93 | 1.02 |
| *Lantana camara* | WP | 3 | 1.38 | native | gamopetalous | orange | tubular | 5.70 | 0.83 | 10.15 | 1.29 |
| *Lecythis minor* | WP | 1 | 1.38 | native | dialipetalous | white | obovate | 46.17 |  | 10.06 |  |
| *Limnocharis flava* | WP | 2 | 0.57 | native | dialipetalous | yellow | rotaceous | 50.00 |  | 22.50 |  |
| *Lippia dulcis* | WP | 129 | 0.31 | native | gamopetalous | white | two-lipped | 1.75 | 0.20 | 2.37 | 0.28 |
| *Ludwigia erecta* | WP | 4 | 0.69 | native | dialipetalous | yellow | rotaceous | 10.82 | 1.10 | 9.47 | 1.13 |
| *Malachra alceifolia* | WP | 295 | 5.60 | native | dialipetalous | yellow | rotaceous | 24.33 | 1.92 | 13.73 | 1.38 |
| *Melochia corchorifolia* | WP | 8 | 0.07 | exotic | dialipetalous | pink | spatulate | 6.73 | 1.18 | 3.89 | 0.91 |
| *Melochia parvifolia* | WP | 48 | 2.42 | native | dialipetalous | white | spatulate | 23.61 | 5.82 | 7.38 | 1.39 |
| *Melothria scabra* | WP | 3 | 1.39 | native | dialipetalous | yellow | rotaceous | 6.02 | 0.51 | 2.82 | 0.47 |
| *Momordica charantia* | WP | 37 | 3.11 | exotic | dialipetalous | yellow | rotaceous | 29.55 | 1.48 | 6.11 | 1.91 |
| *Richardia Brasil* | WP | 3 | 0.17 | native | gamopetalous | white | tubular | 4.79 | 1.05 | 4.60 | 0.71 |
| *Senna obtusifolia* | WP | 11 | 1.02 | native | dialipetalous | yellow | bell-shaped | 25.81 | 4.09 | 14.08 | 1.57 |
| *Sida acuta* | WP | 88 | 4.58 | native | dialipetalous | yellow | rotaceous | 25.30 | 5.03 | 8.95 | 2.36 |
| *Sida cerradoensis* | WP | 1 | 1.65 | native | dialipetalous | orange | rotaceous | 25.99 | 4.15 | 11.79 | 3.50 |
| *Sida sp.* | WP | 24 | 0.22 | native | dialipetalous | white | rotaceous | 16.20 | 0.99 | 4.42 | 0.94 |
| *Simarouba amara* | WP | 1 | 1.38 | native | dialipetalous | green | rotaceous | 5.57 |  | 2.65 |  |
| *Spermacoce densiflora* | WP | 5 | 0.01 | native | gamopetalous | white | tubular | 2.38 | 0.30 | 1.84 | 0.40 |
| *Spermacoce remota* | WP | 3 | 0.85 | native | gamopetalous | white | tubular | 8.50 |  | 3.25 |  |
| *Thalia geniculata* | WP | 127 | 0.29 | native | gamopetalous | purple | tubular | 4.00 |  | 16.73 | 7.12 |
| *Torenia crustacea* | WP | 1 | 1.04 | exotic | gamopetalous | purple | tubular | 3.72 | 0.60 | 7.45 | 0.70 |
| *Abutilon sp.* | OP | 5 | 0.35 | native | dialipetalous | yellow | rotaceous | 7.55 |  | 6.17 |  |
| *Acmella alba* | OP | 53 | 0.79 | native | gamopetalous | white | tubular | 10.37 | 1.19 | 1.65 | 0.16 |
| *Aeschynomene americana* | OP | 6 | 1.08 | native | dialipetalous | yellow | papilionaceous flower | 9.64 | 0.68 | 8.74 | 0.64 |
| *Asclepias curassavica* | OP | 2 | 1.84 | native | gamopetalous | red | rotaceous | 10.58 | 2.59 | 3.23 | 0.35 |
| *Asystasia intrusa* | OP | 46 | 0.35 | exotic | gamopetalous | white | tubular | 11.00 | 0.79 | 12.34 | 1.26 |
| *Calopogonium mucunoides* | OP | 155 | 0.95 | native | dialipetalous | purple | papilionaceous flower | 7.88 | 0.67 | 11.01 | 0.58 |
| *Centrosema virginianum* | OP | 8 | 1.31 | native | dialipetalous | purple | papilionaceous flower | 27.14 | 5.94 | 17.61 | 1.10 |
| *Citrus limon* | OP | 3 | 2.05 | exotic | dialipetalous | white | rotaceous | 18.09 | 2.01 | 3.19 | 0.79 |
| *Cnidoscolus urens* | OP | 34 | 2.68 | native | achlamydeous | white | rotaceous | 4.85 | 0.90 | 4.39 | 0.27 |
| *Commelina erecta* | OP | 2 | 1.08 | native | dialipetalous | blue | zygomorphic | 19.09 | 4.28 | 5.16 | 1.42 |
| *Corchorus aestuans* | OP | 10 | 0.53 | native | dialipetalous | yellow | rotaceous | 7.48 | 0.42 | 3.99 | 0.61 |
| *Crotalaria spectabilis* | OP | 2 | 1.32 | exotic | dialipetalous | yellow | papilionaceous flower | 24.14 | 1.21 | 17.01 | 1.16 |
| *Cucumis melo* | OP | 26 | 3.13 | exotic | gamopetalous | yellow | rotaceous | 21.62 | 2.07 | 8.78 | 1.39 |
| *Cuphea carthagenensis* | OP | 4 | 1.18 | native | gamopetalous | purple | tubular | 5.72 |  | 7.05 | 0.87 |
| *Desmodium incanum* | OP | 15 | 0.90 | native | dialipetalous | pink | papilionaceous flower | 6.91 | 0.94 | 6.52 | 0.86 |
| *Eleutheranthera ruderalis* | OP | 1 | 1.70 | native | gamopetalous | yellow | tubular | 3.40 | 0.62 | 4.45 | 0.61 |
| *Euphorbia heterophylla* | OP | 5 | 0.41 | native | achlamydeous | white | achlamydeous | 2.50 |  | 2.50 |  |
| *Funastrum clausum* | OP | 25 | 0.79 | native | gamopetalous | white | rotaceous | 15.49 | 3.34 | 4.99 | 1.00 |
| *Galictia sp.* | OP | 212 | 1.49 | native | dialipetalous | purple | papilionaceous flower | 4.61 | 0.91 | 6.88 | 1.58 |
| *Galinsoga quadriradiata* | OP | 8 | 0.49 | native | gamopetalous | yellow | tubular | 13.66 | 1.51 | 3.94 | 0.96 |
| *Heliotropium indicum* | OP | 2 | 1.19 | native | gamopetalous | white | salverform | 4.44 | 0.29 | 4.93 | 1.02 |
| *Hydrolea spinosa* | OP | 46 | 3.03 | native | gamopetalous | blue | rotaceous | 13.95 | 1.56 | 4.42 | 0.69 |
| *Ipomoea muricata* | OP | 8 | 0.51 | native | gamopetalous | lilac | bell-shaped | 29.10 | 2.90 | 27.67 | 4.36 |
| *Lantana camara* | OP | 16 | 0.48 | native | gamopetalous | orange | tubular | 5.70 | 0.83 | 10.15 | 1.29 |
| *Lippia dulcis* | OP | 421 | 1.96 | native | gamopetalous | white | two-lipped | 1.75 | 0.20 | 2.37 | 0.28 |
| *Ludwigia erecta* | OP | 6 | 0.51 | native | dialipetalous | yellow | rotaceous | 10.82 | 1.10 | 9.47 | 1.13 |
| *Ludwigia octovalvis* | OP | 6 | 0.61 | native | dialipetalous | yellow | rotaceous | 23.70 | 2.32 | 5.44 | 1.76 |
| *Ludwigia peruviana* | OP | 6 | 0.48 | native | dialipetalous | yellow | rotaceous | 30.00 |  | 9.14 |  |
| *Macroptilium lathyroides* | OP | 2 | 1.71 | native | dialipetalous | red | papilionaceous flower | 8.00 | 1.70 | 16.81 | 4.17 |
| *Malachra alceifolia* | OP | 112 | 2.95 | native | dialipetalous | yellow | rotaceous | 24.33 | 1.92 | 13.73 | 1.38 |
| *Malachra fasciata* | OP | 1 | 1.71 | native | dialipetalous | white | rotaceous | 12.50 |  | 7.00 |  |
| *Melampodium divaricatum* | OP | 1 | 3.69 | native | gamopetalous | yellow | tubular | 13.21 | 0.84 | 2.72 |  |
| *Melochia corchorifolia* | OP | 14 | 1.29 | exotic | dialipetalous | pink | spatulate | 6.73 | 1.18 | 3.89 | 0.91 |
| *Melochia parvifolia* | OP | 189 | 3.91 | native | dialipetalous | white | spatulate | 23.61 | 5.82 | 7.38 | 1.39 |
| *Melothria scabra* | OP | 1 | 1.28 | native | dialipetalous | yellow | rotaceous | 6.02 | 0.51 | 2.82 | 0.47 |
| *Mikania sp.* | OP | 2 | 1.03 | native | gamopetalous | white | tubular | 4.70 |  | 2.70 |  |
| *Momordica charantia* | OP | 29 | 1.79 | exotic | dialipetalous | yellow | rotaceous | 29.55 | 1.48 | 6.11 | 1.91 |
| *Nymphoides sp.* | OP | 6 | 1.52 | native | gamopetalous | white | salverform | 21.77 | 1.45 | 9.71 | 2.28 |
| *Physalis angulata* | OP | 1 | 1.45 | native | gamopetalous | yellow | rotaceous | 15.61 |  | 9.15 |  |
| *Portulaca oleracea* | OP | 1 | 1.81 | exotic | dialipetalous | yellow | rotaceous | 8.28 | 0.75 | 5.40 | 0.35 |
| *Richardia Brasil* | OP | 6 | 0.47 | native | gamopetalous | white | tubular | 4.79 | 1.05 | 4.60 | 0.71 |
| *Senna obtusifolia* | OP | 6 | 0.98 | native | dialipetalous | yellow | bell-shaped | 25.81 | 4.09 | 14.08 | 1.57 |
| *Sida acuta* | OP | 149 | 3.73 | native | dialipetalous | yellow | rotaceous | 25.30 | 5.03 | 8.95 | 2.36 |
| *Sida sp.* | OP | 2 | 0.91 | native | dialipetalous | white | rotaceous | 16.20 | 0.99 | 4.42 | 0.94 |
| *Tarenaya hassleriana* | OP | 4 | 0.35 | exotic | dialipetalous | white | rotaceous | 40.00 |  | 25.00 |  |
| *Thalia geniculata* | OP | 47 | 0.33 | native | gamopetalous | purple | tubular | 4.00 |  | 16.73 | 7.12 |

Table S7. Summary of bootstrap-derived estimates of interactive roles (PC1) for butterflies and plants under different pasture management types. Values include the number of species per management type, mean ± SD, 95% bootstrap confidence intervals, and the full range of observed PC1 scores used to compare network roles across management systems.

| Taxon | Management | N species | Mean ± SD | 95% CI bootstrap | Range |
| --- | --- | --- | --- | --- | --- |
| Butterflies | FAP | 27 | 1.273 ± 0.932 | [0.942, 1.639] | 0.051 - 3.635 |
| Butterflies | WP | 24 | 1.606 ± 0.726 | [1.338, 1.907] | 0.456 - 3.273 |
| Butterflies | OP | 27 | 1.342 ± 0.883 | [1.037, 1.691] | 0.119 - 3.199 |
| Plants | FAP | 43 | 1.273 ± 0.991 | [1.013, 1.59] | 0.127 - 4.895 |
| Plants | WP | 38 | 1.138 ± 1.192 | [0.806, 1.518] | 0.011 - 5.603 |
| Plants | OP | 46 | 1.394 ± 0.968 | [1.13, 1.671] | 0.334 - 3.911 |

Table S8. Parameter estimates and model performance metrics from generalized linear models testing the relationship between functional traits and species’ interactive roles (PC1) across pasture management types. Analyses were performed independently for butterflies (wing length, body length, proboscis length) and plants (corolla width, corolla length, corolla type, corolla shape, corolla color, geographic origin). For each model term, the table reports β estimates, standard errors, test statistics, P-values, lower and upper confidence limits, marginal R², AIC, and sample size.

| Taxon | Management | Traits | Term | Stimate (*β*) | SE | Statictic | P-value | Conf_low | Conf_high | r2 | aic | n |
| --- | --- | --- | --- | --- | --- | --- | --- | --- | --- | --- | --- | --- |
| Butterflies | FAP | Wing length | Wing length | -0.02 | 0.02 | -0.89 | 0.384 | -0.05 | 0.02 | 0.03 | 76.95 | 27 |
| Butterflies | FAP | Body length | Body length | -0.03 | 0.04 | -0.86 | 0.395 | -0.10 | 0.04 | 0.03 | 76.99 | 27 |
| Butterflies | FAP | Proboscis | Proboscis | 0.02 | 0.04 | 0.55 | 0.590 | -0.05 | 0.09 | 0.01 | 77.47 | 27 |
| Butterflies | WP | Wing length* | Wing length | -0.03 | 0.01 | -2.08 | 0.049 | -0.06 | 0.00 | 0.16 | 53.43 | 24 |
| Butterflies | WP | Body length* | Body length | -0.07 | 0.03 | -2.77 | 0.011 | -0.12 | -0.02 | 0.26 | 50.58 | 24 |
| Butterflies | WP | Proboscis | Proboscis | -0.03 | 0.03 | -1.14 | 0.268 | -0.09 | 0.02 | 0.06 | 56.37 | 24 |
| Butterflies | OP | Wing length | Wing length | 0.01 | 0.02 | 0.38 | 0.710 | -0.03 | 0.04 | 0.01 | 74.74 | 27 |
| Butterflies | OP | Body length | Body length | 0.01 | 0.03 | 0.43 | 0.669 | -0.05 | 0.08 | 0.01 | 74.70 | 27 |
| Butterflies | OP | Proboscis | Proboscis | 0.05 | 0.03 | 1.52 | 0.141 | -0.01 | 0.12 | 0.08 | 72.51 | 27 |
| Plants | FAP | Corolla width* | Corolla width | 0.04 | 0.02 | 2.68 | 0.010 | 0.01 | 0.07 | 0.15 | 119.25 | 43 |
| Plants | FAP | Corolla lenght | Corolla lenght | 0.03 | 0.03 | 0.98 | 0.333 | -0.03 | 0.08 | 0.02 | 125.20 | 43 |
| Plants | FAP | Origin | OriginNative | -0.75 | 0.51 | -1.46 | 0.151 | -1.76 | 0.25 | 0.05 | 124.01 | 43 |
| Plants | FAP | Corolla type | typeDialipetalous | 0.73 | 0.59 | 1.23 | 0.227 | -0.43 | 1.89 | 0.11 | 123.43 | 43 |
| Plants | FAP | Corolla type | typeGamopetalous | 0.11 | 0.60 | 0.18 | 0.855 | -1.06 | 1.28 | 0.11 | 123.43 | 43 |
| Plants | WP | Corolla width* | Corolla width | 0.04 | 0.02 | 2.34 | 0.025 | 0.01 | 0.07 | 0.13 | 120.84 | 38 |
| Plants | WP | Corolla lenght | Corolla lenght | 0.07 | 0.04 | 1.66 | 0.106 | -0.01 | 0.14 | 0.07 | 123.39 | 38 |
| Plants | WP | Origin | OriginNative | 0.11 | 0.54 | 0.20 | 0.842 | -0.95 | 1.16 | 0.00 | 126.15 | 38 |
| Plants | WP | Corolla type | typeDialipetalous | 0.79 | 0.70 | 1.12 | 0.271 | -0.59 | 2.16 | 0.13 | 122.85 | 38 |
| Plants | WP | Corolla type | typeGamopetalous | -0.09 | 0.73 | -0.13 | 0.899 | -1.53 | 1.34 | 0.13 | 122.85 | 38 |
| Plants | OP | Corolla width | Corolla width | 0.02 | 0.02 | 1.01 | 0.318 | -0.01 | 0.05 | 0.02 | 131.47 | 46 |
| Plants | OP | Corolla lenght | Corolla lenght | -0.03 | 0.02 | -1.25 | 0.216 | -0.08 | 0.02 | 0.03 | 130.91 | 46 |
| Plants | OP | Origin | OriginNative | -0.14 | 0.38 | -0.37 | 0.711 | -0.89 | 0.60 | 0.00 | 132.38 | 46 |
| Plants | OP | Corolla type | typeDialipetalous | -0.14 | 0.73 | -0.20 | 0.845 | -1.57 | 1.28 | 0.00 | 134.45 | 46 |
| Plants | OP | Corolla type | typeGamopetalous | -0.18 | 0.74 | -0.24 | 0.808 | -1.62 | 1.26 | 0.00 | 134.45 | 46 |
|  | | | | | | | | | | | | |
| * Statistical significance α< 0.05 | | | | | | | | | | | | |

Fig S1a. Meta-networks of plant–butterfly interactions: forest-adjacent pastures (FAP).


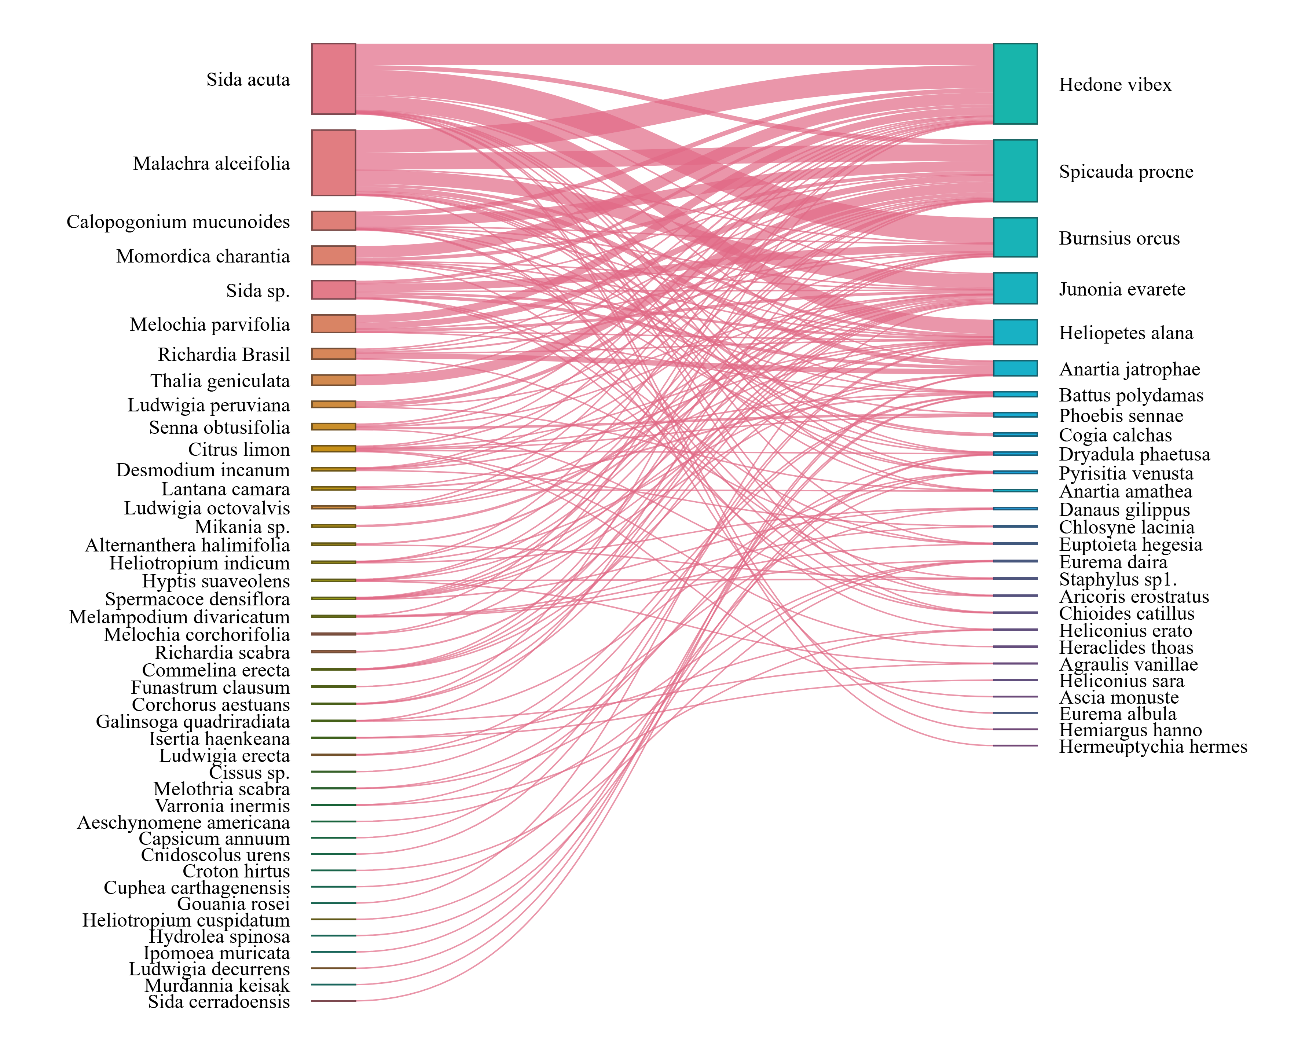


Fig S1b. Meta-networks of plant–butterfly interactions: wooded pastures (WP)


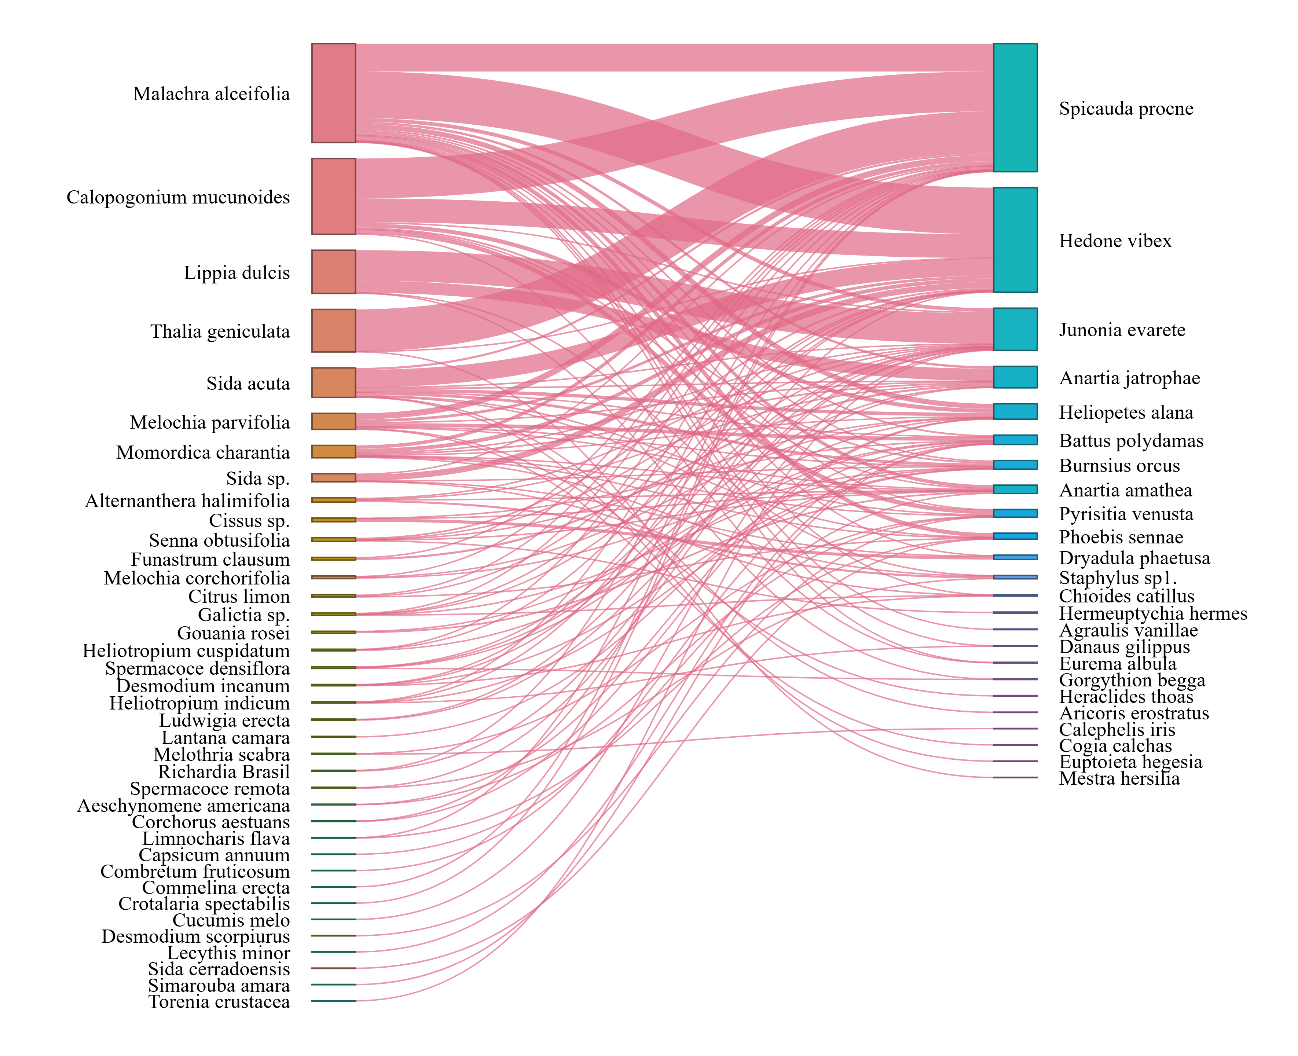


Fig S1c. Meta-networks of plant–butterfly interactions: open pastures (OP).


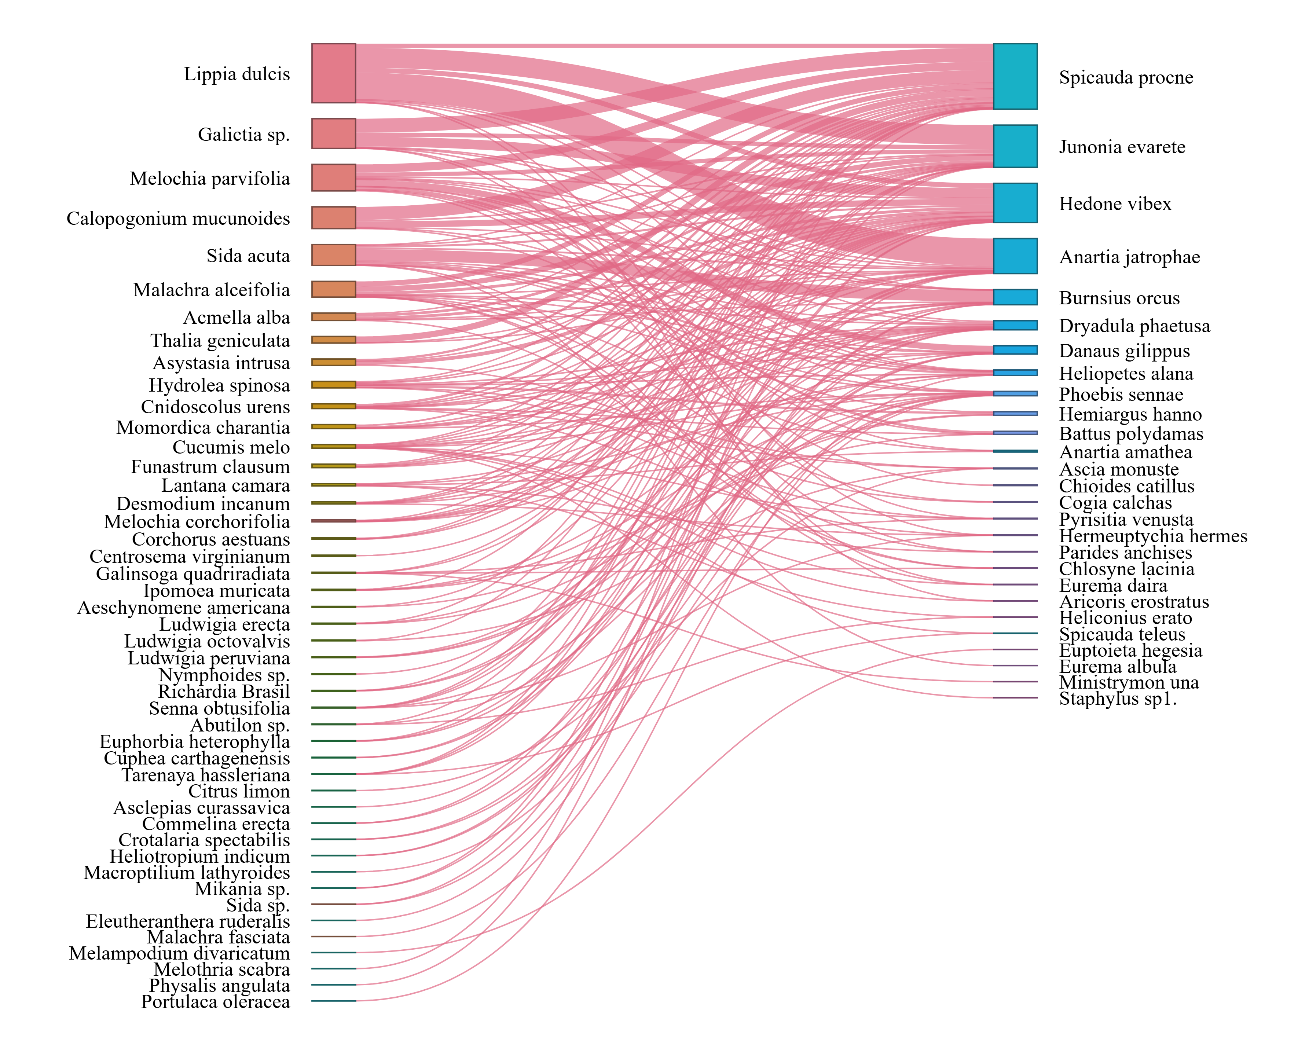

Supplement: Supplementary file 1 [file ad7190832b93ee86854bd013.docx]
